# Supplementary material
Source: publisher site journal article supplement (https://www.dovepress.com/article/515826)
Supplement: Supplementary file 1 [file 515826%20Supplementary%20Material.pdf]

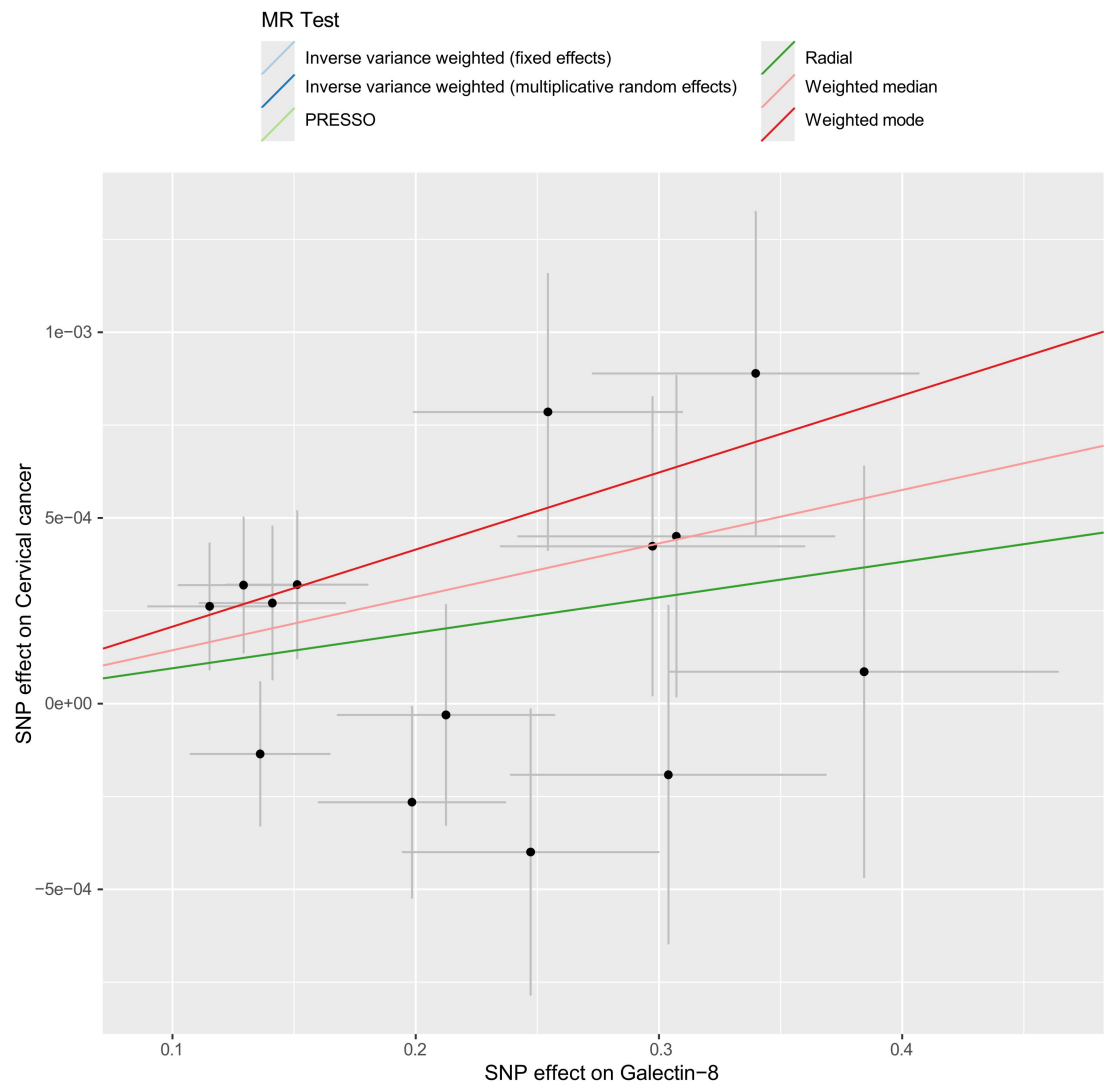

Figure S1 The scatter plot of MR analysis (Galectin-3 to Cervical cancer)

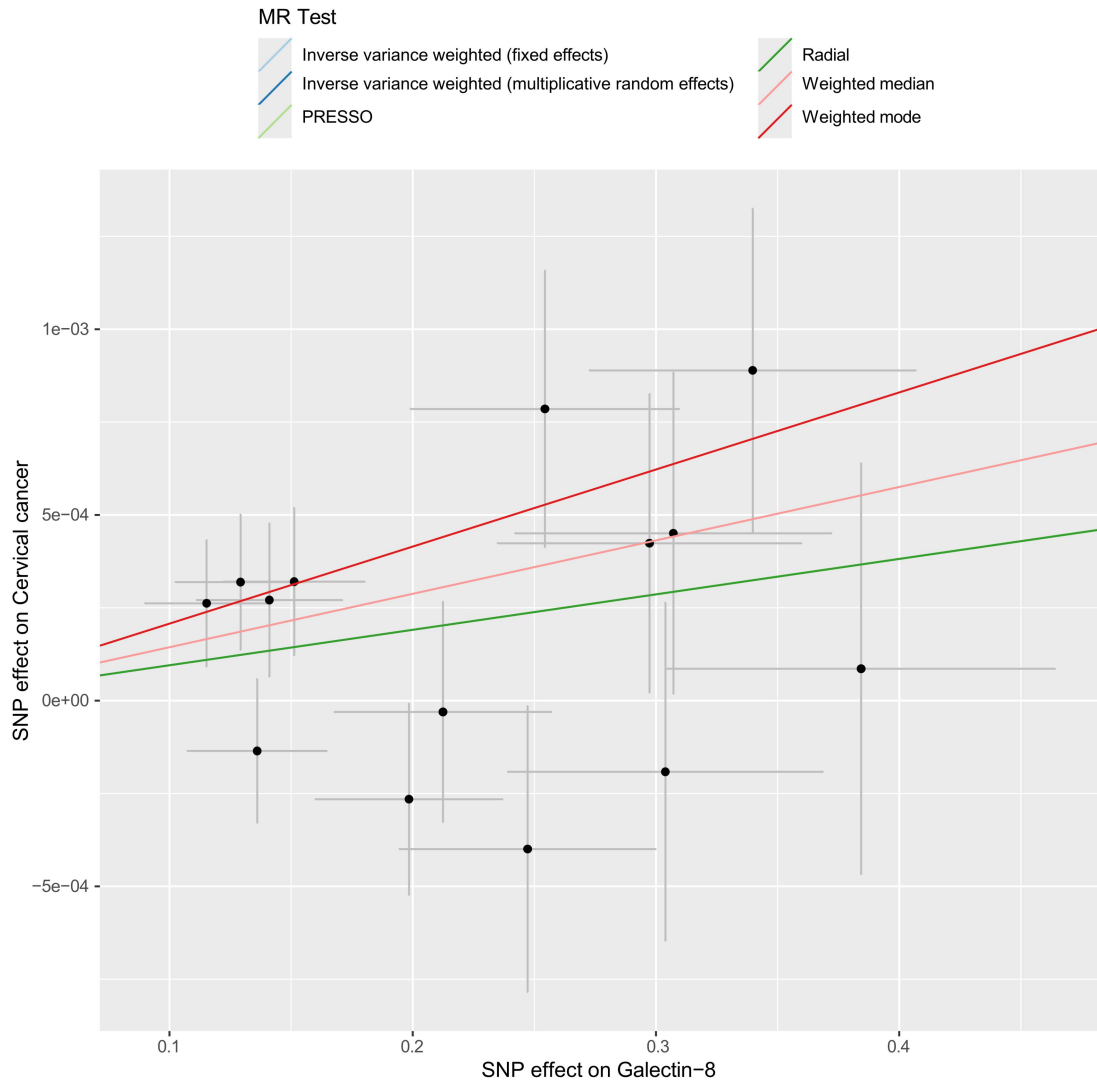

Figure S2 The scatter plot of MR analysis (Galectin-8 to Cervical cancer)

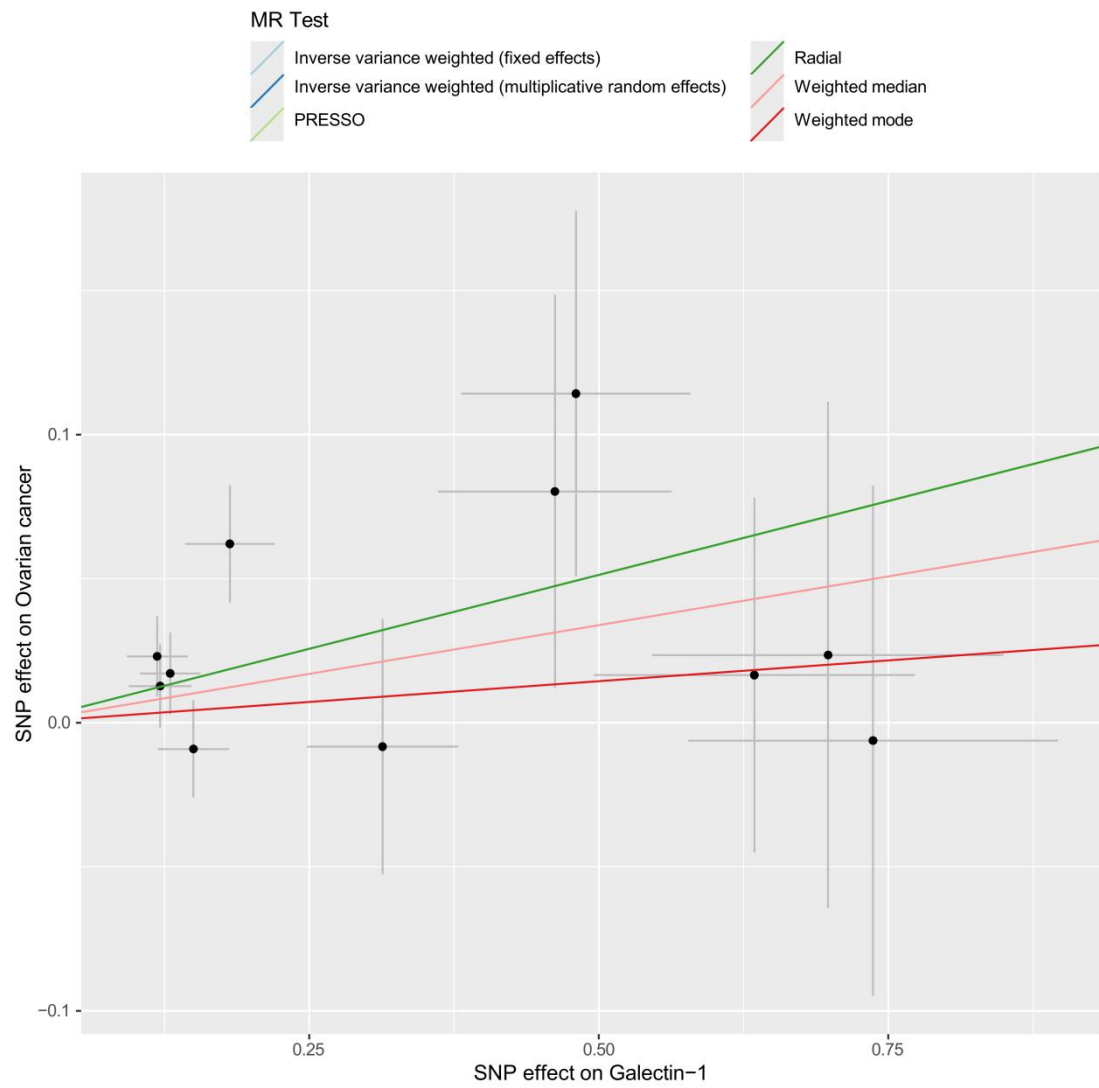

Figure S3 The scatter plot of MR analysis (Galectin-1 to Ovarian cancer)

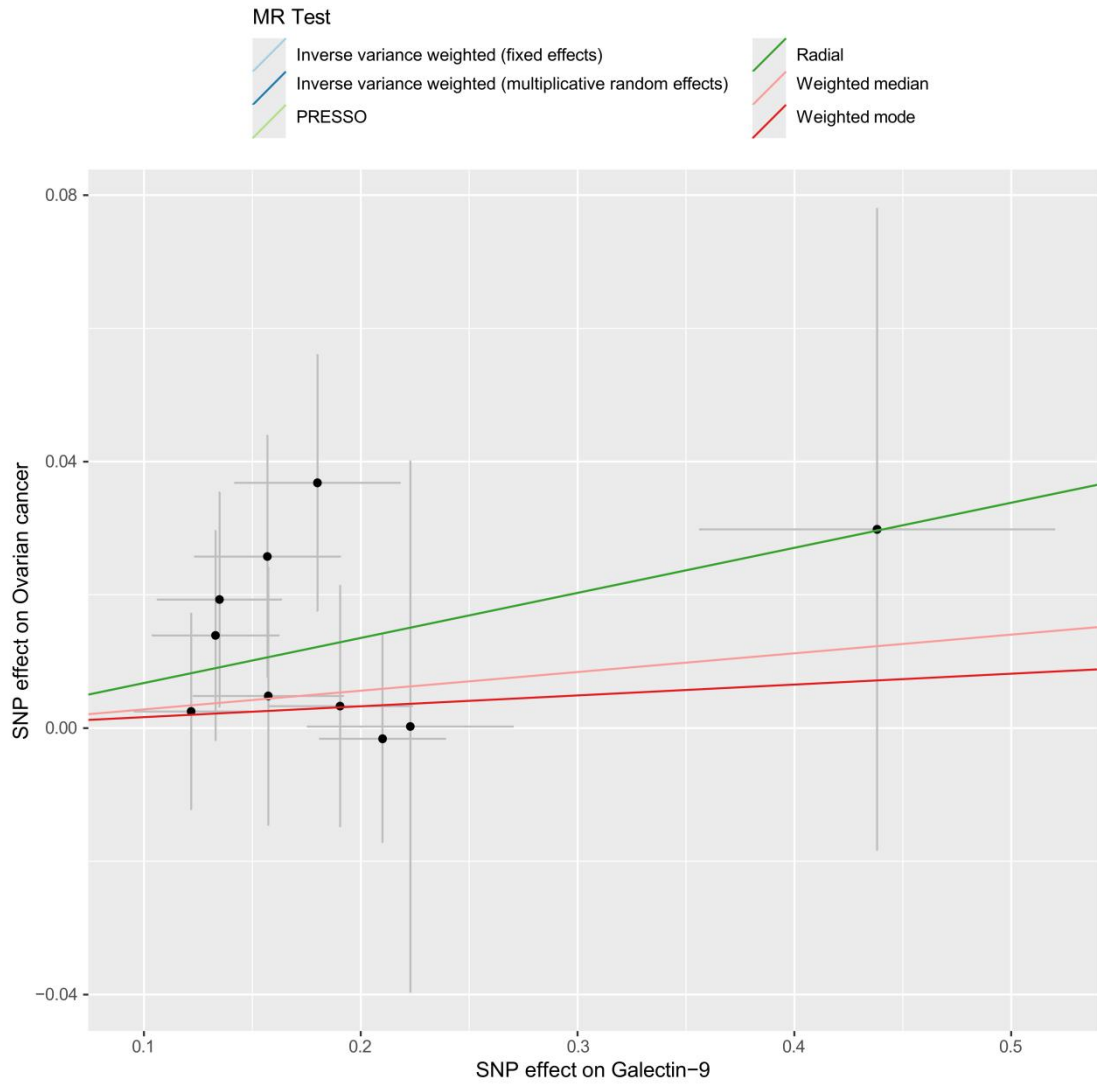

Figure S4 The scatter plot of MR analysis (Galectin-9 to Ovarian cancer)

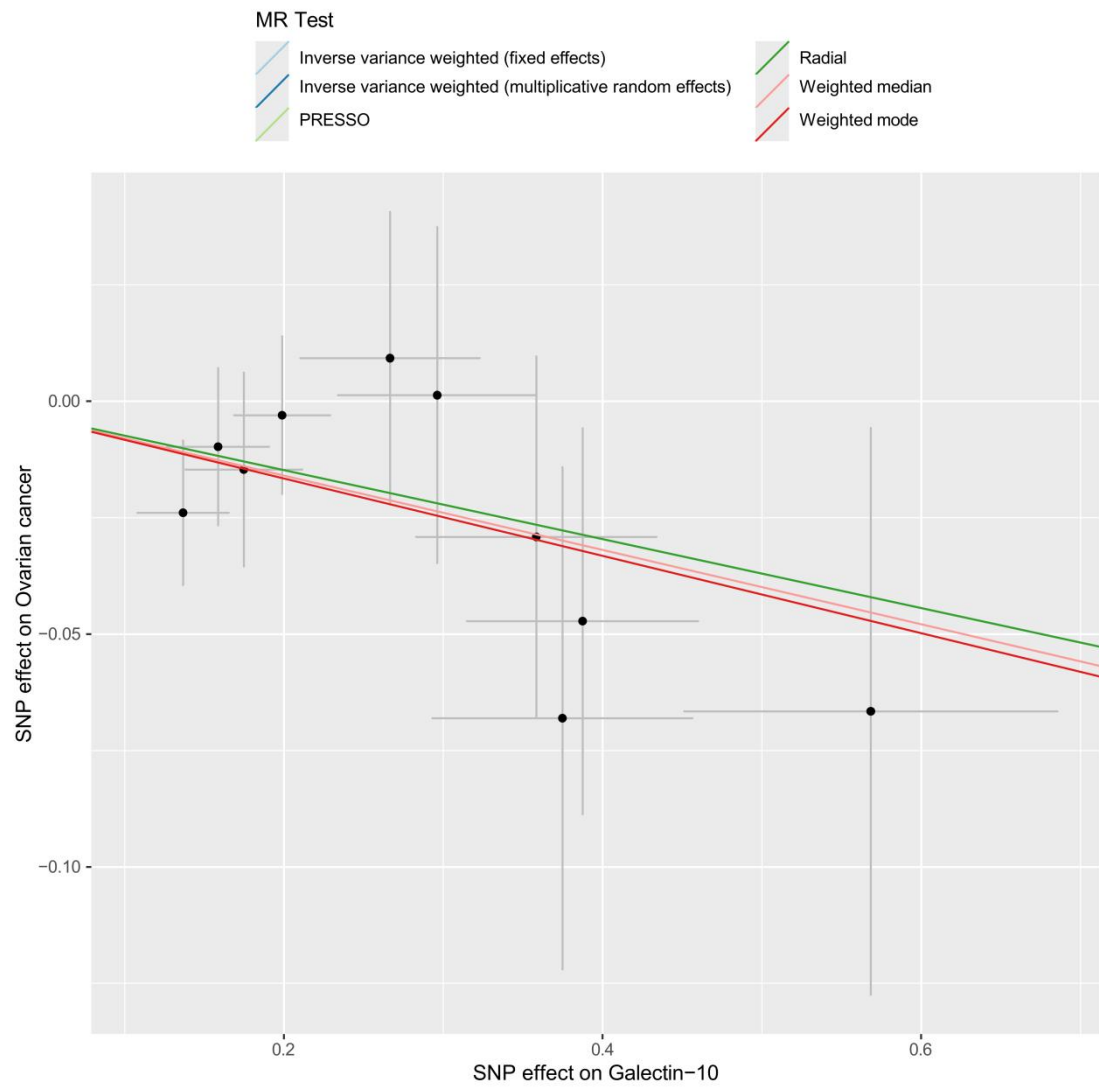

Figure S5 The scatter plot of forward MR analysis (Galectin-10 to Ovarian cancer)

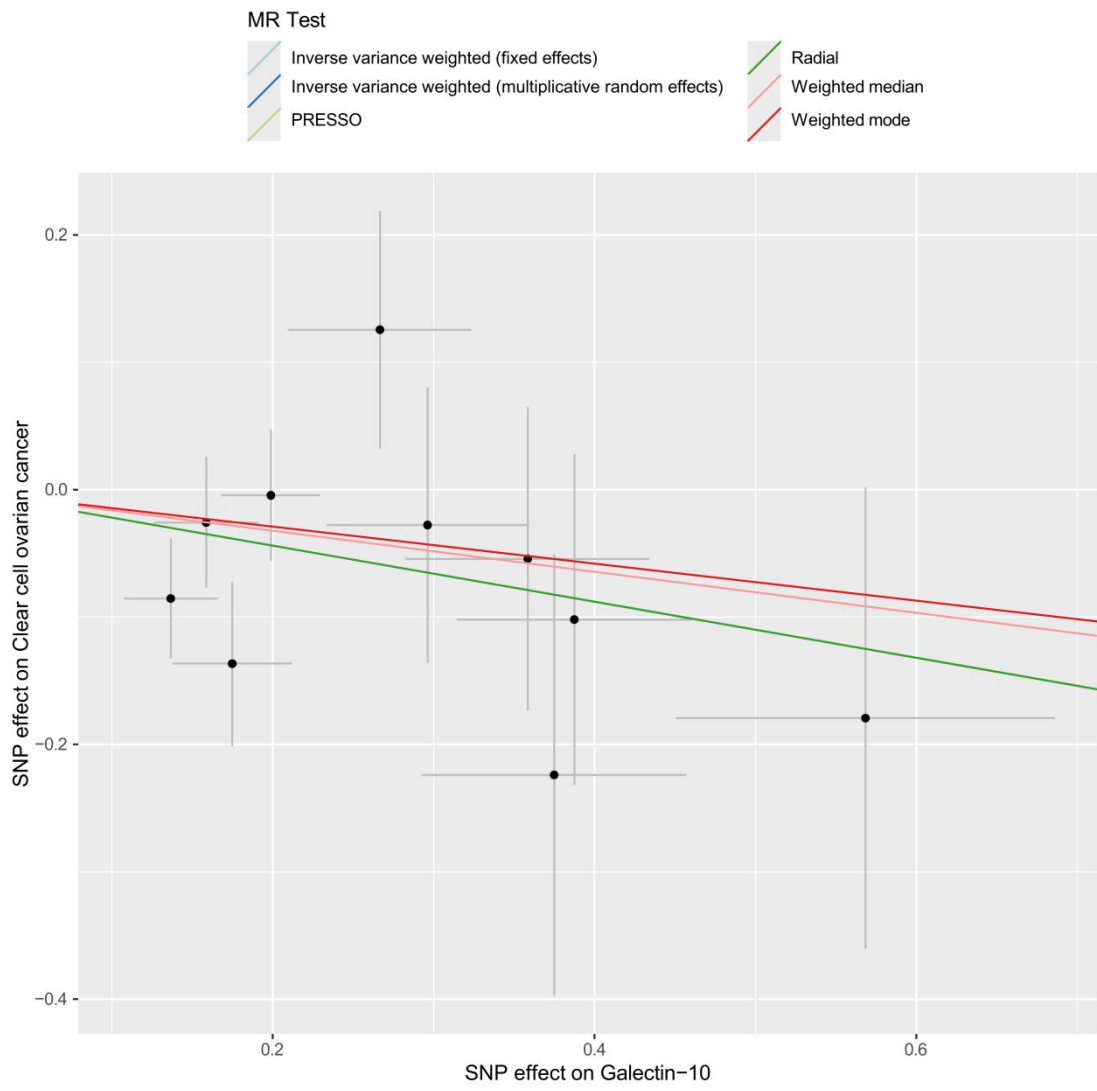

Figure S6 The scatter plot of forward MR analysis (Galectin-10 to Clear cell ovarian cancer)

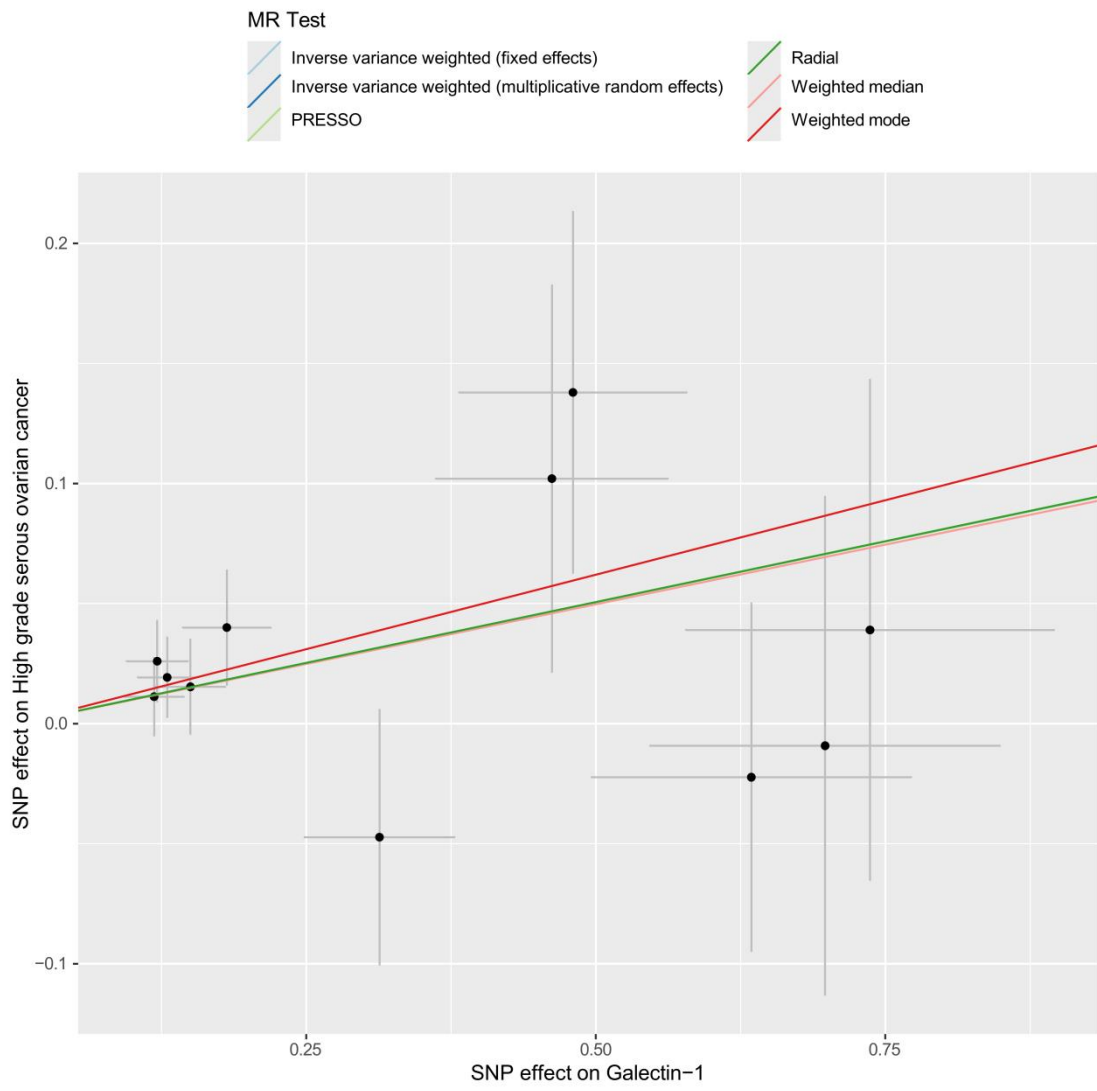

Figure S7 The scatter plot of MR analysis (Galectin-1 to High grade serous ovarian cancer)

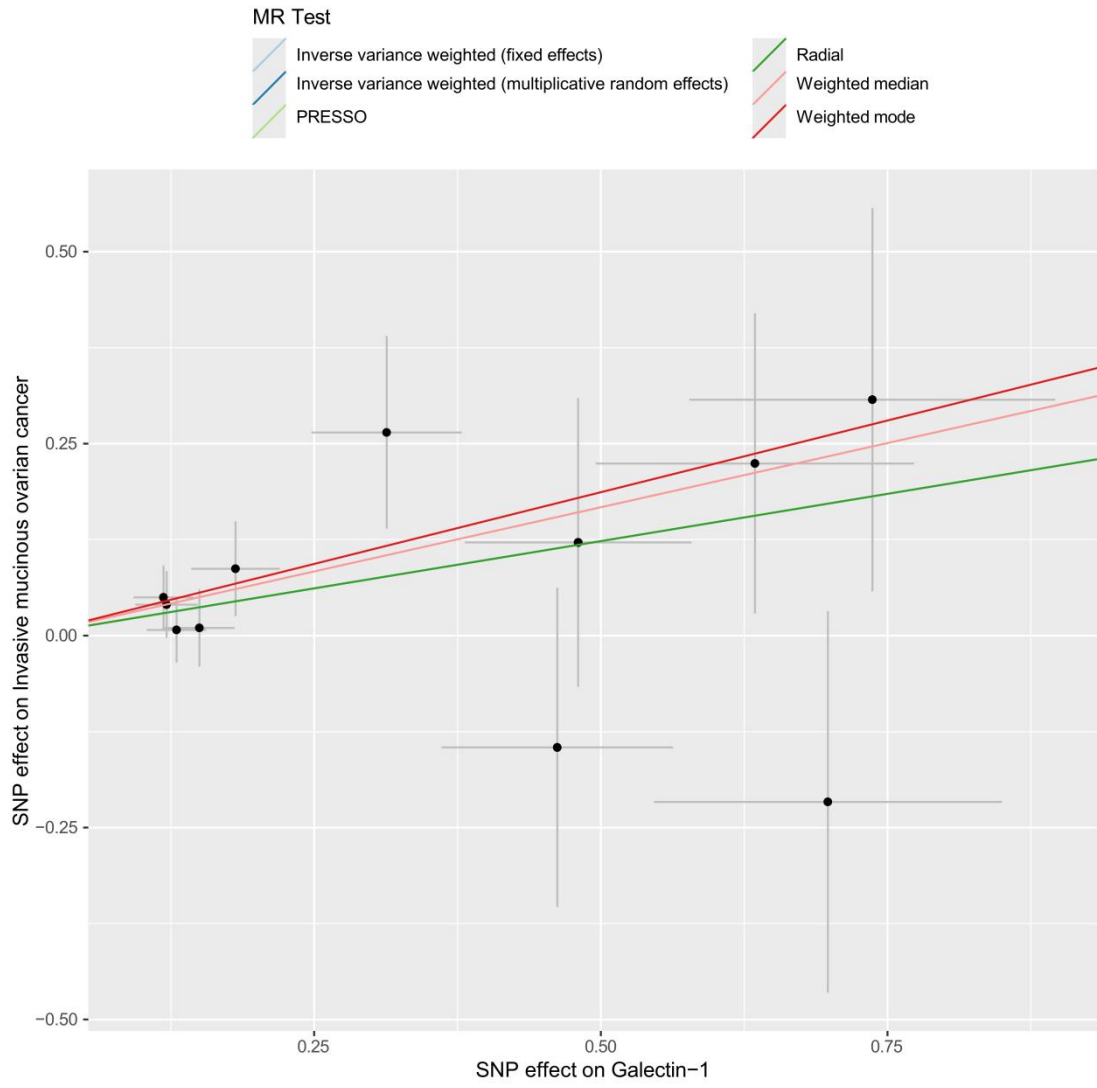

Figure S8 The scatter plot of MR analysis (Galectin-1 to Invasive mucinous ovarian cancer)

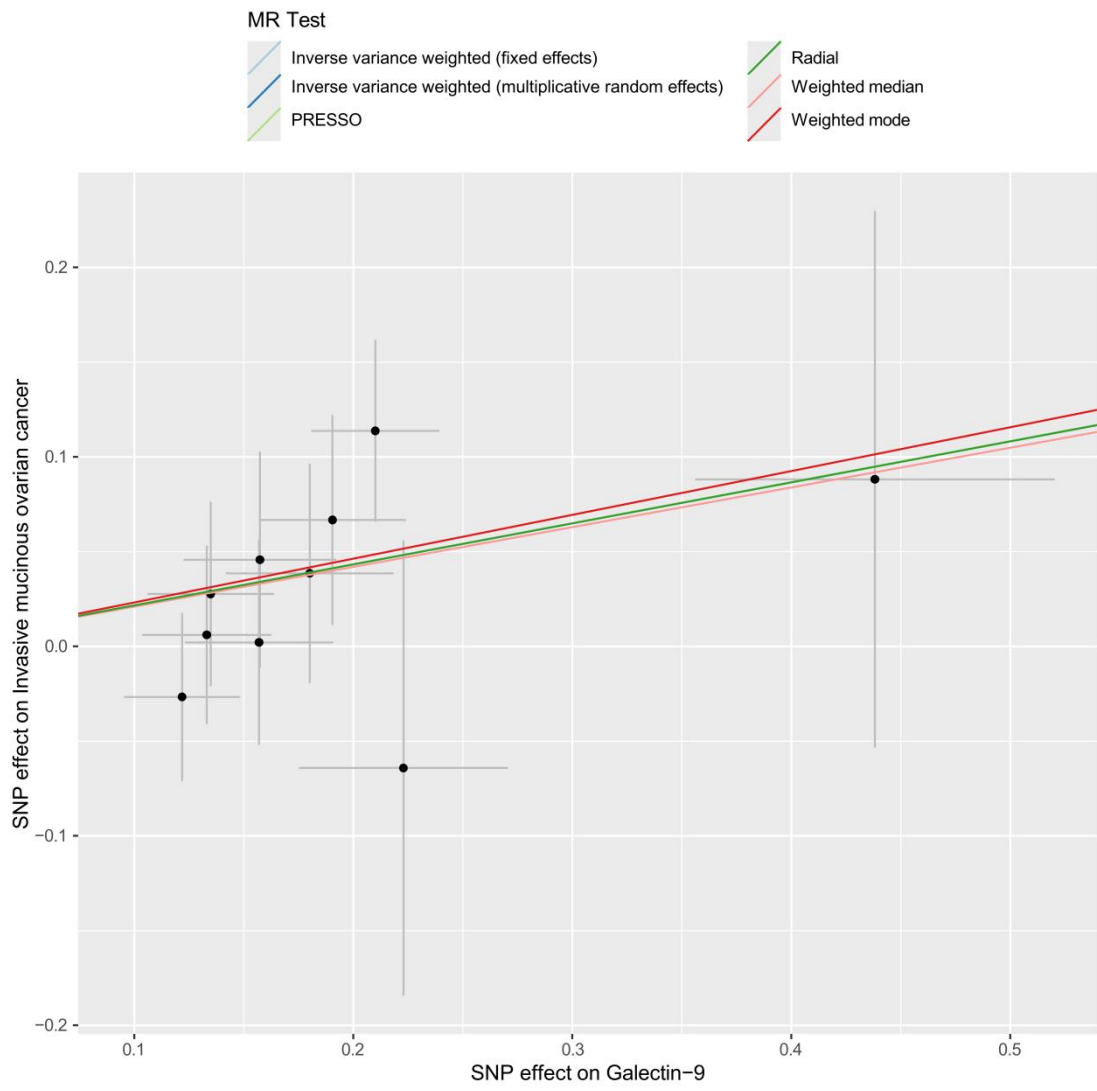

Figure S9 The scatter plot of MR analysis (Galectin-9 to Invasive mucinous ovarian cancer)

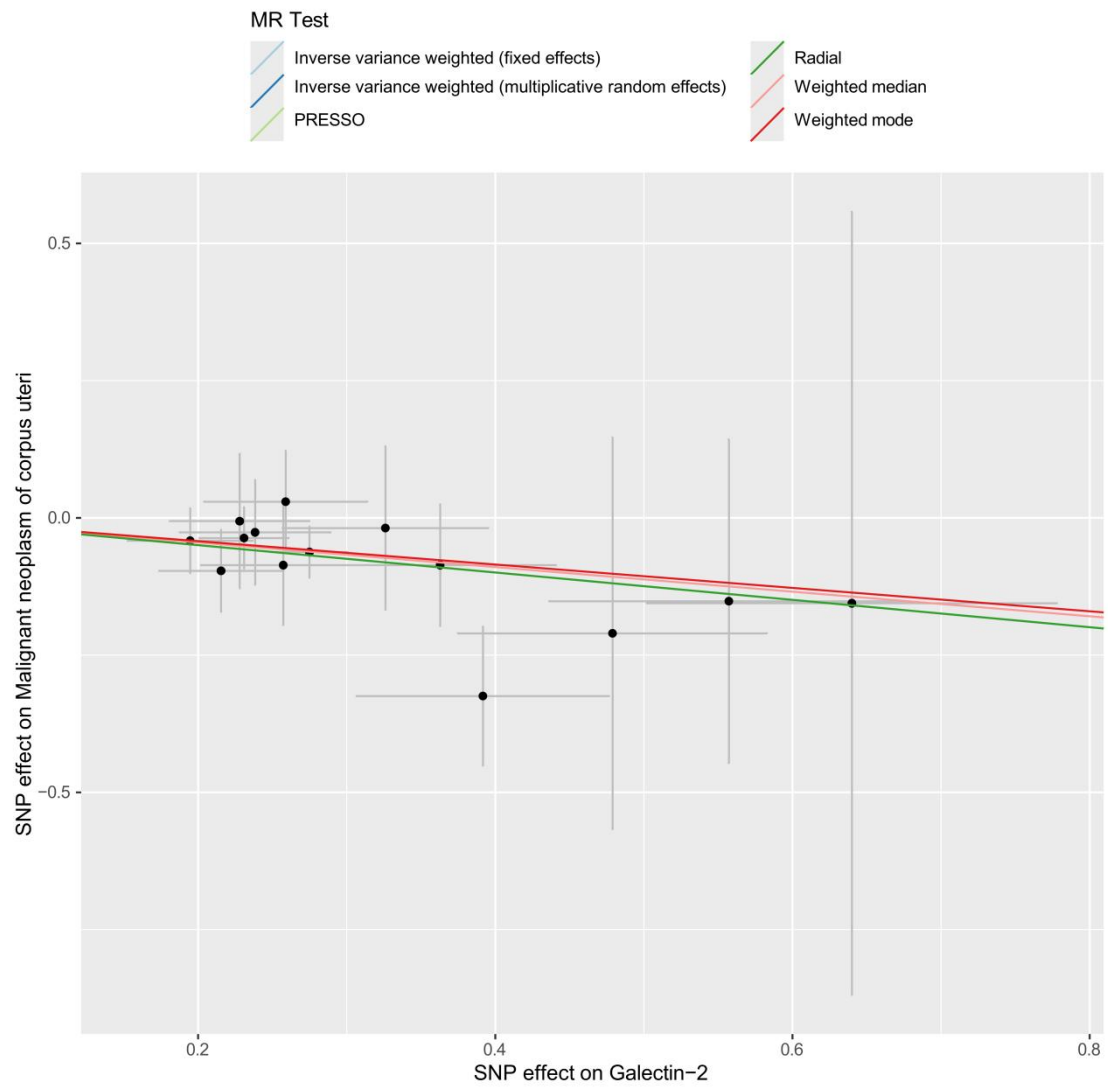

Figure S10 The scatter plot of MR analysis (Galectin-2 to Malignant neoplasm of corpus uteri)

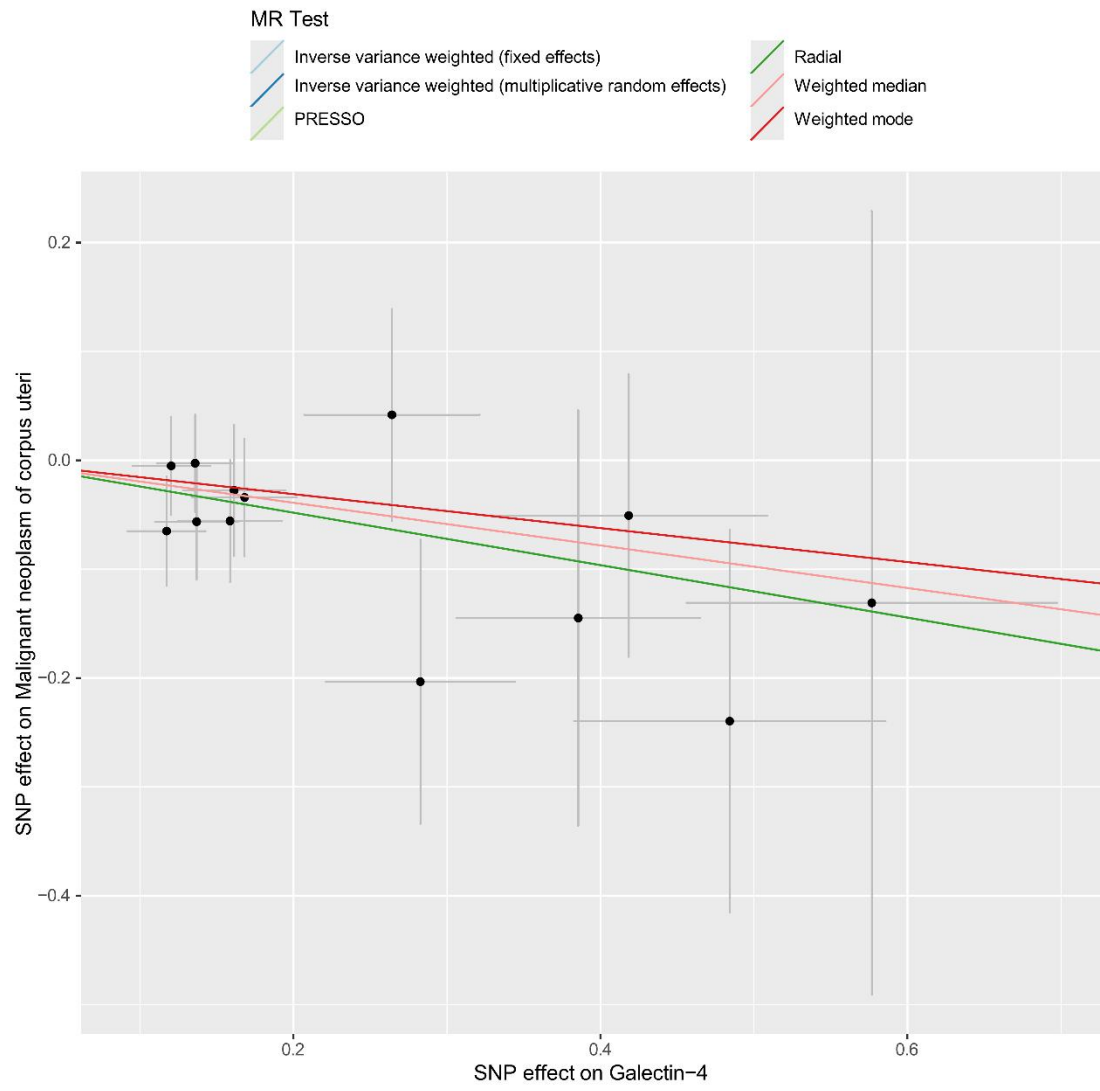

Figure S11 The scatter plot of MR analysis (Galectin-4 to Malignant neoplasm of corpus uteri)

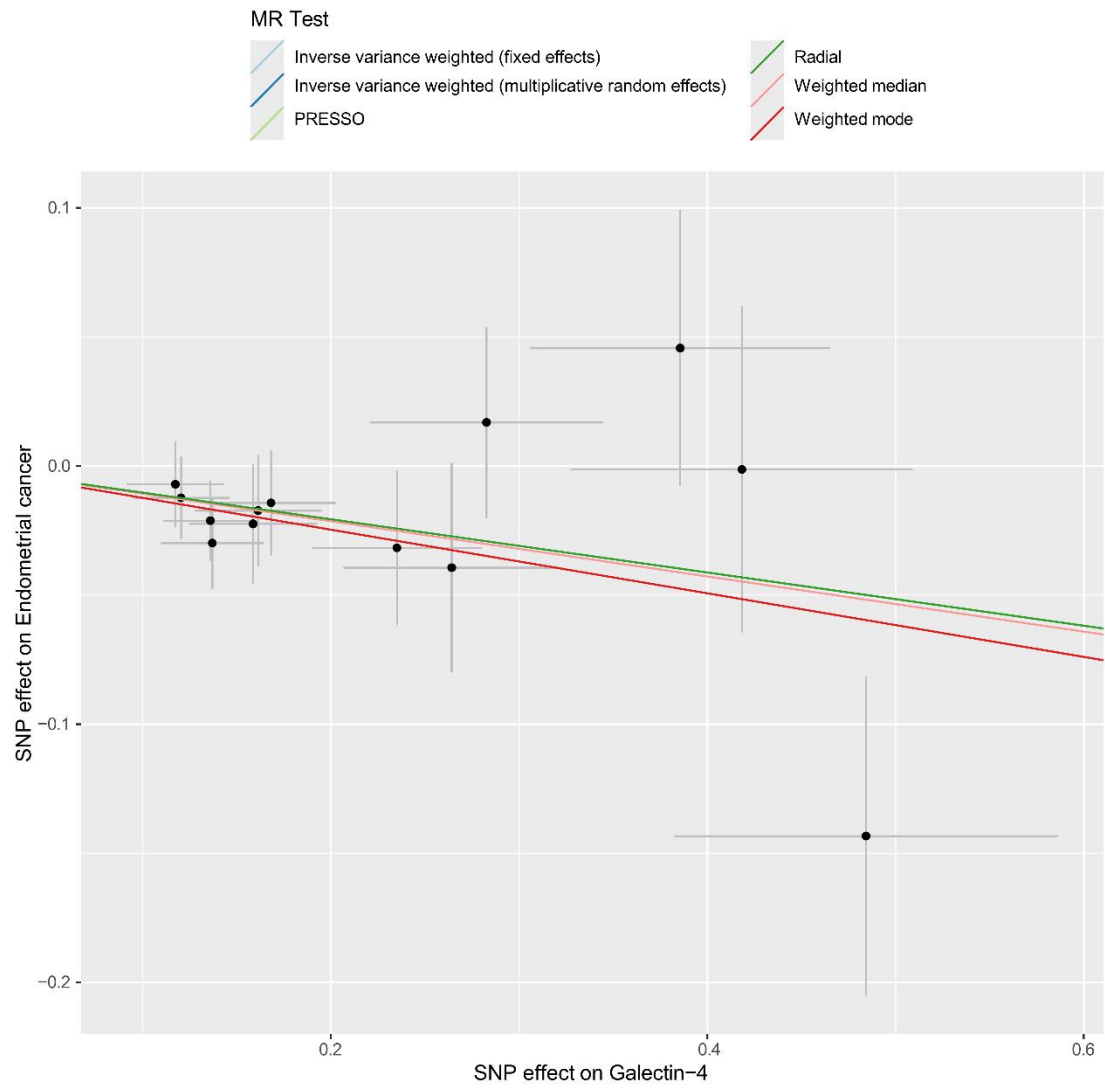

Figure S12 The scatter plot of MR analysis (Galectin-4 to Endometrial cancer)

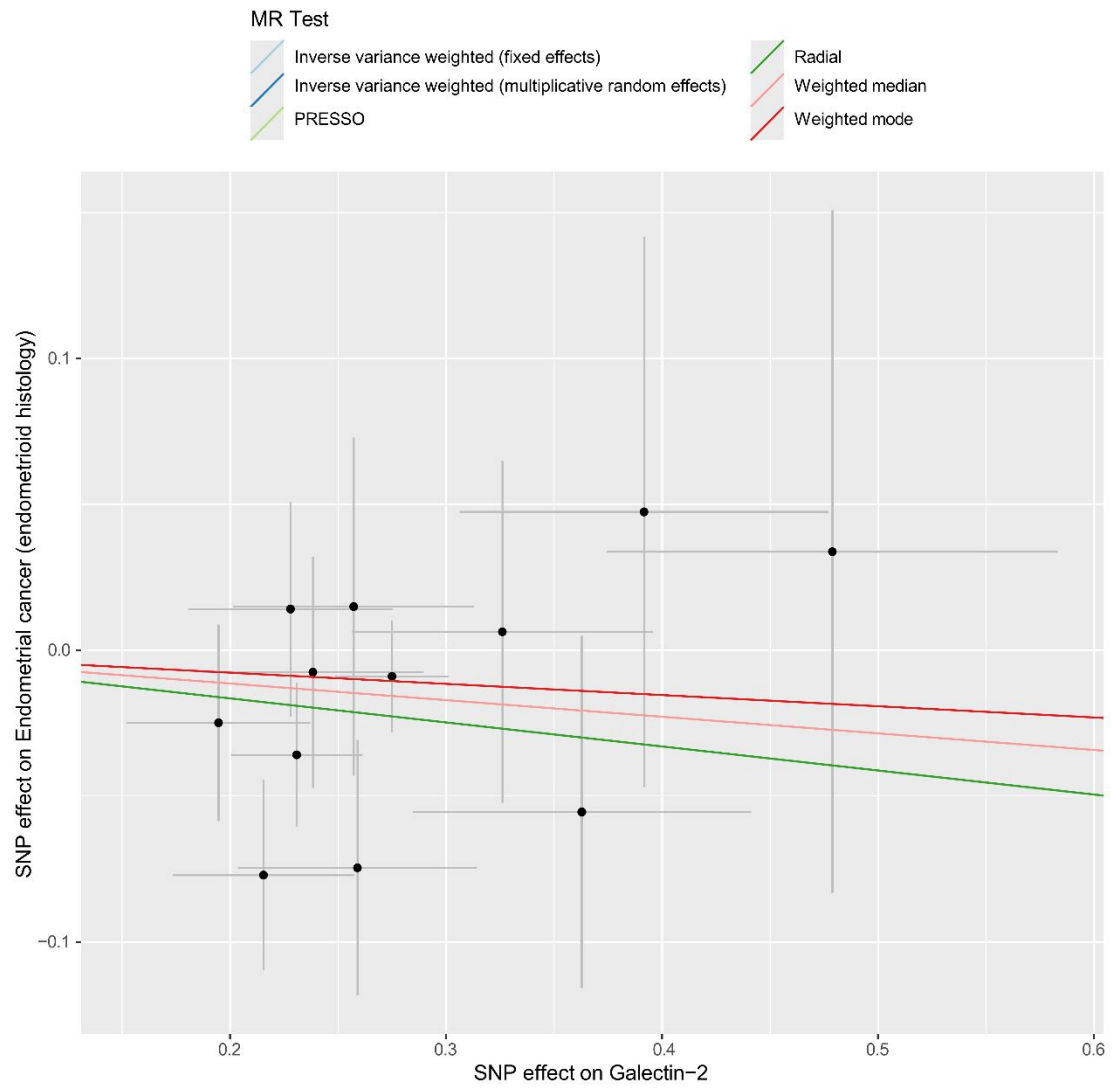

Figure S13 The scatter plot of MR analysis (Galectin-2 to Endometrial cancer (endometrioid histology))

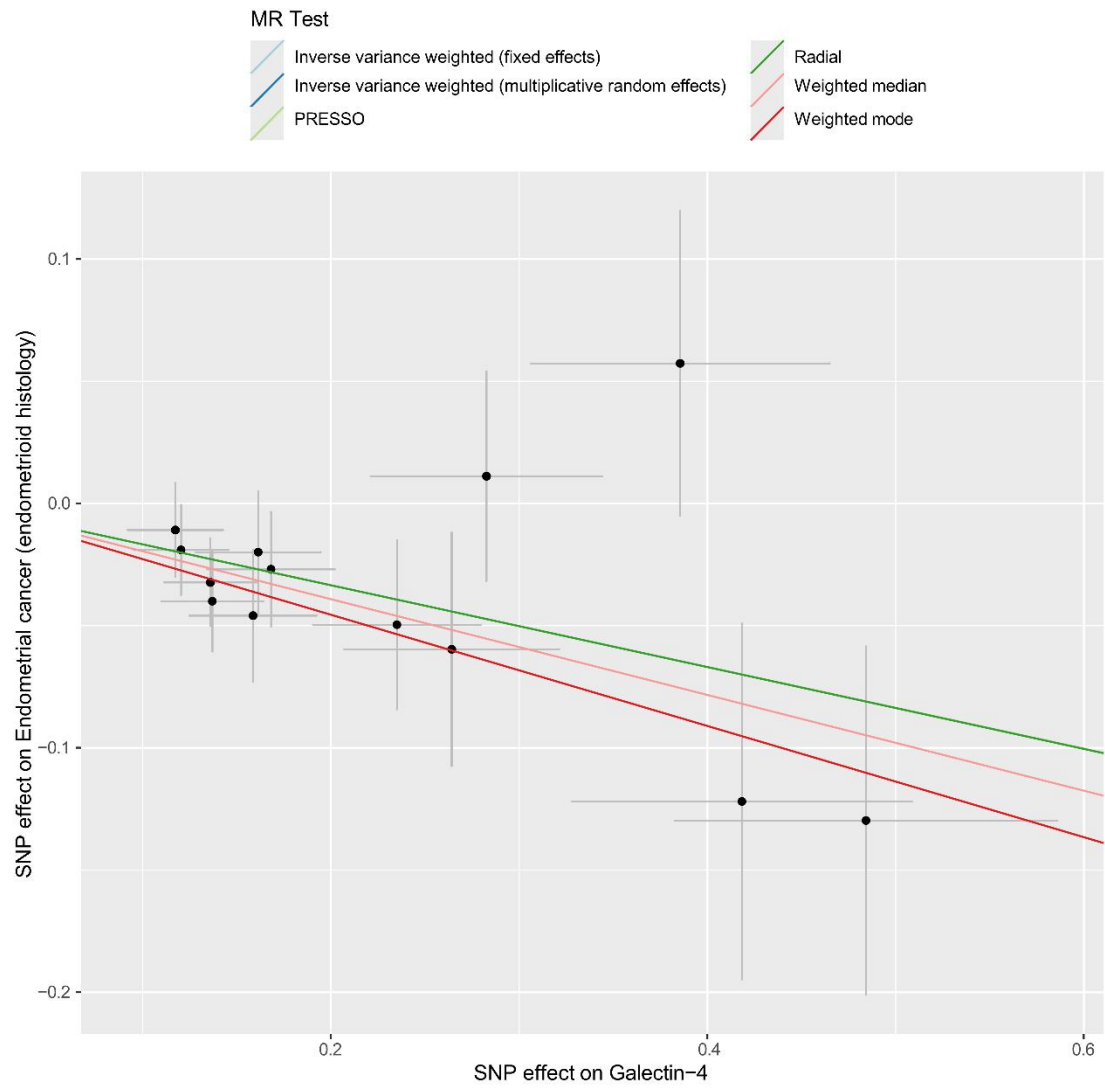

Figure S14 The scatter plot of MR analysis (Galectin-4 to Endometrial cancer (endometrioid histology))

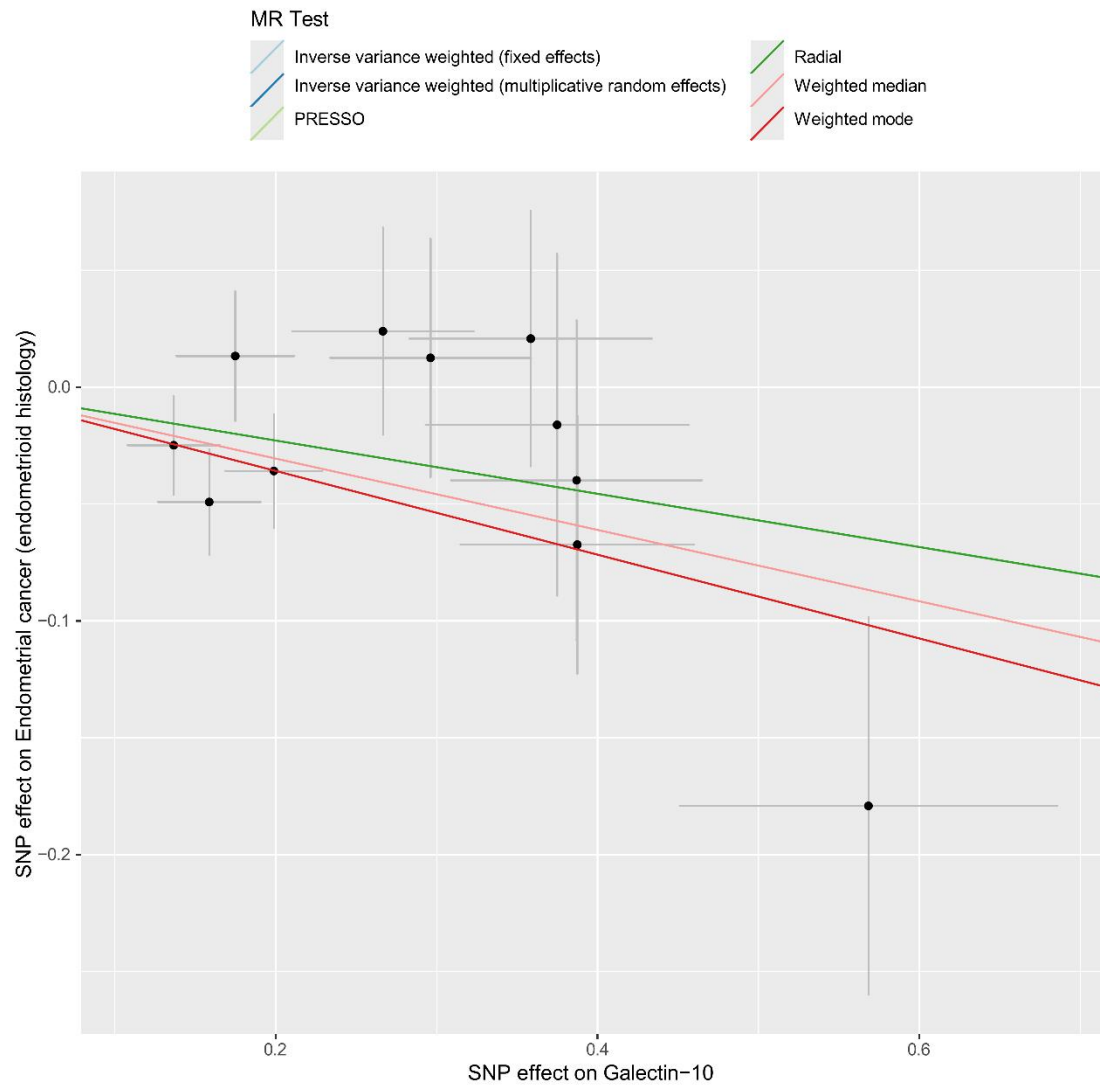

Figure S15 The scatter plot of MR analysis (Galectin-10 to Endometrial cancer (endometrioid histology))

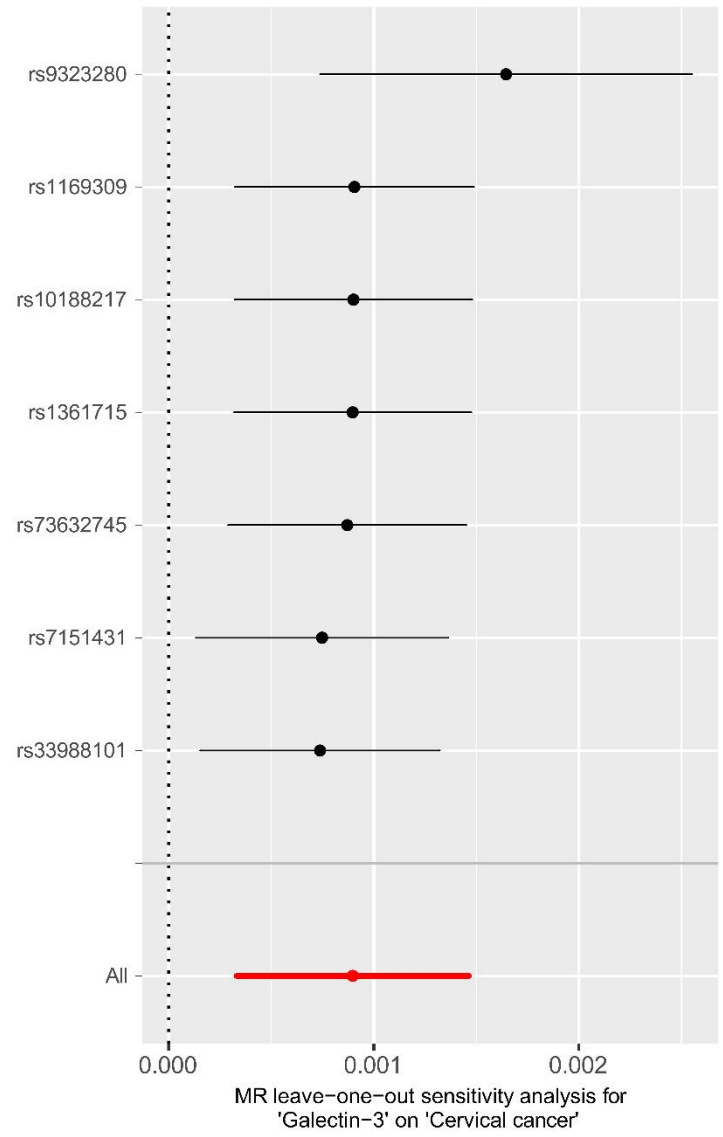

Figure S16 MR leave-one-out sensitivity analysis of Galectin-3 to Cervical cancer

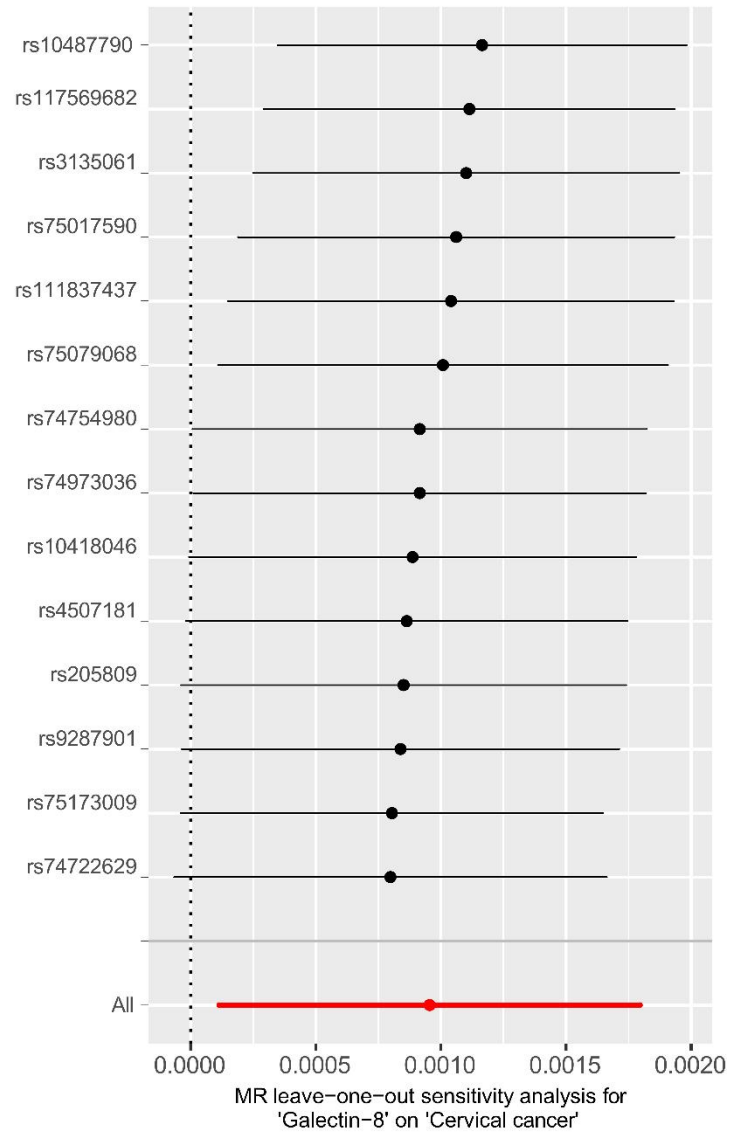

Figure S17 MR leave-one-out sensitivity analysis of Galectin-8 to Cervical cancer

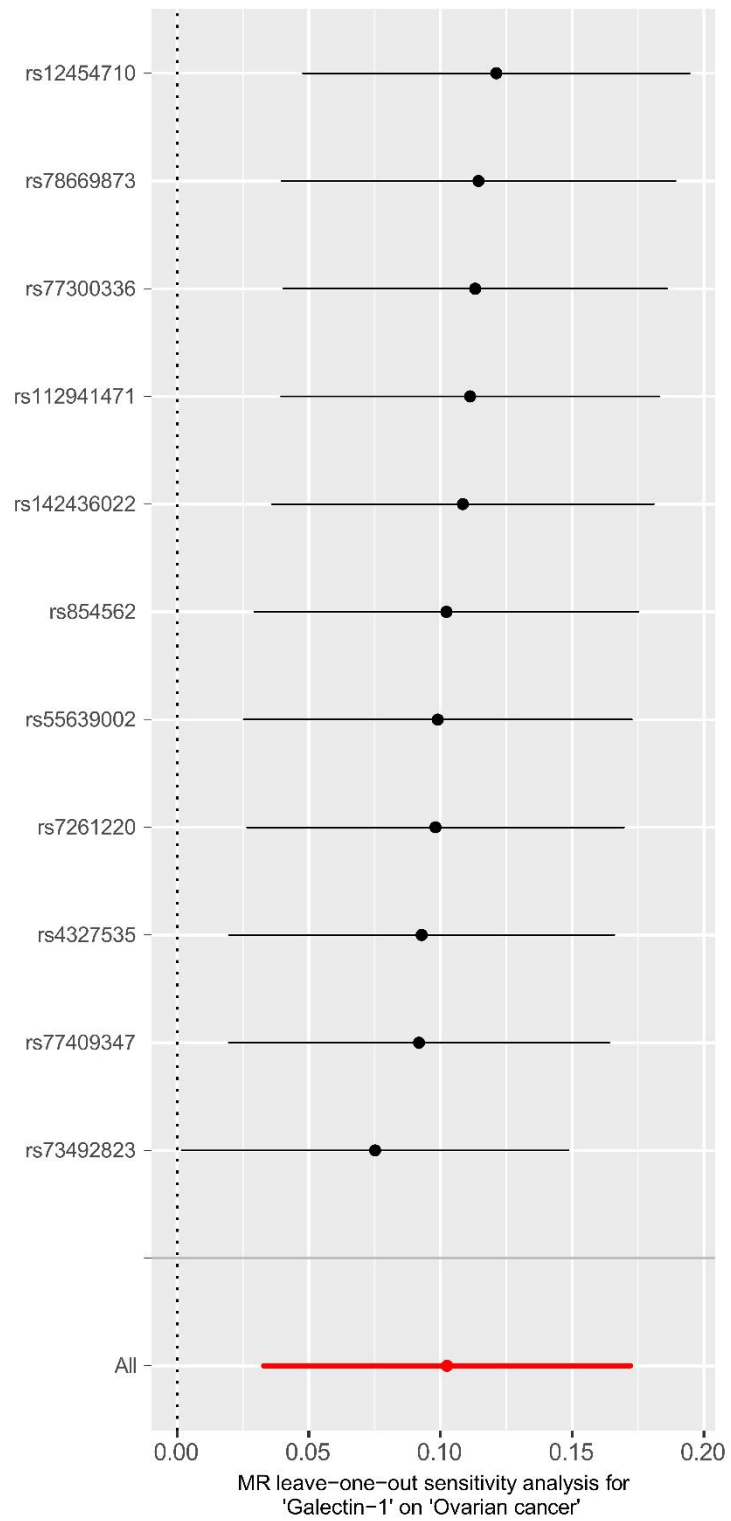

Figure S18 MR leave-one-out sensitivity analysis of Galectin-1 to Ovarian cancer

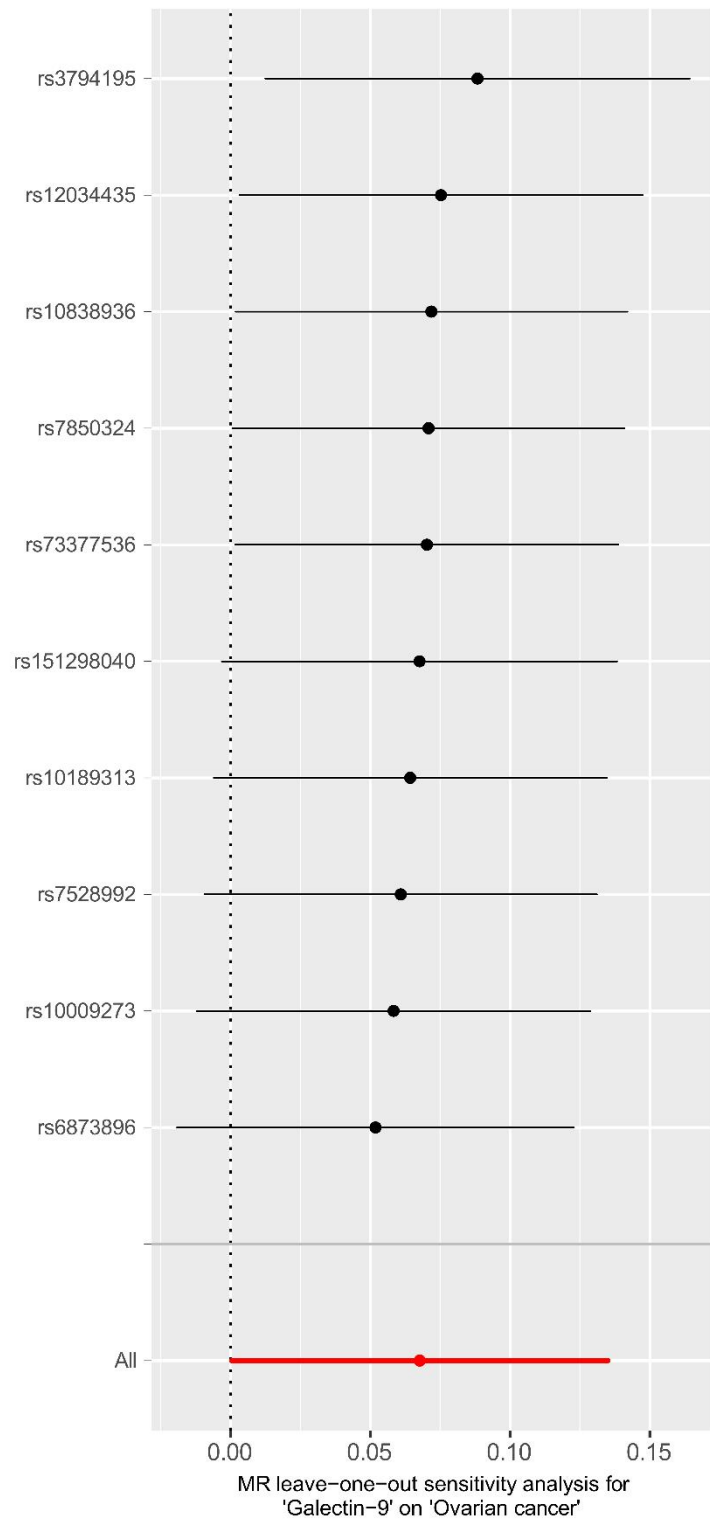

Figure S19 MR leave-one-out sensitivity analysis of Galectin-9 to Ovarian cancer

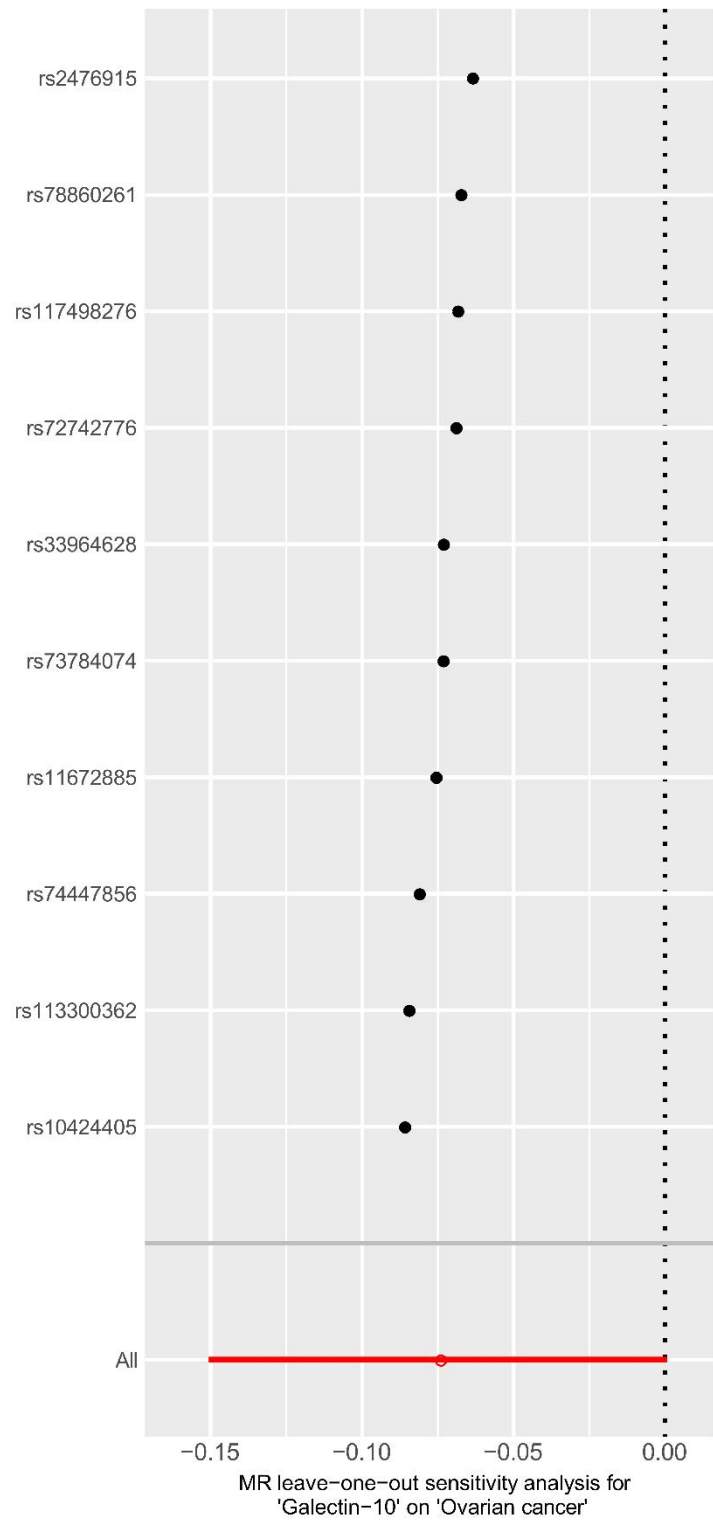

Figure S20 MR leave-one-out sensitivity analysis of Galectin-10 to Ovarian cancer

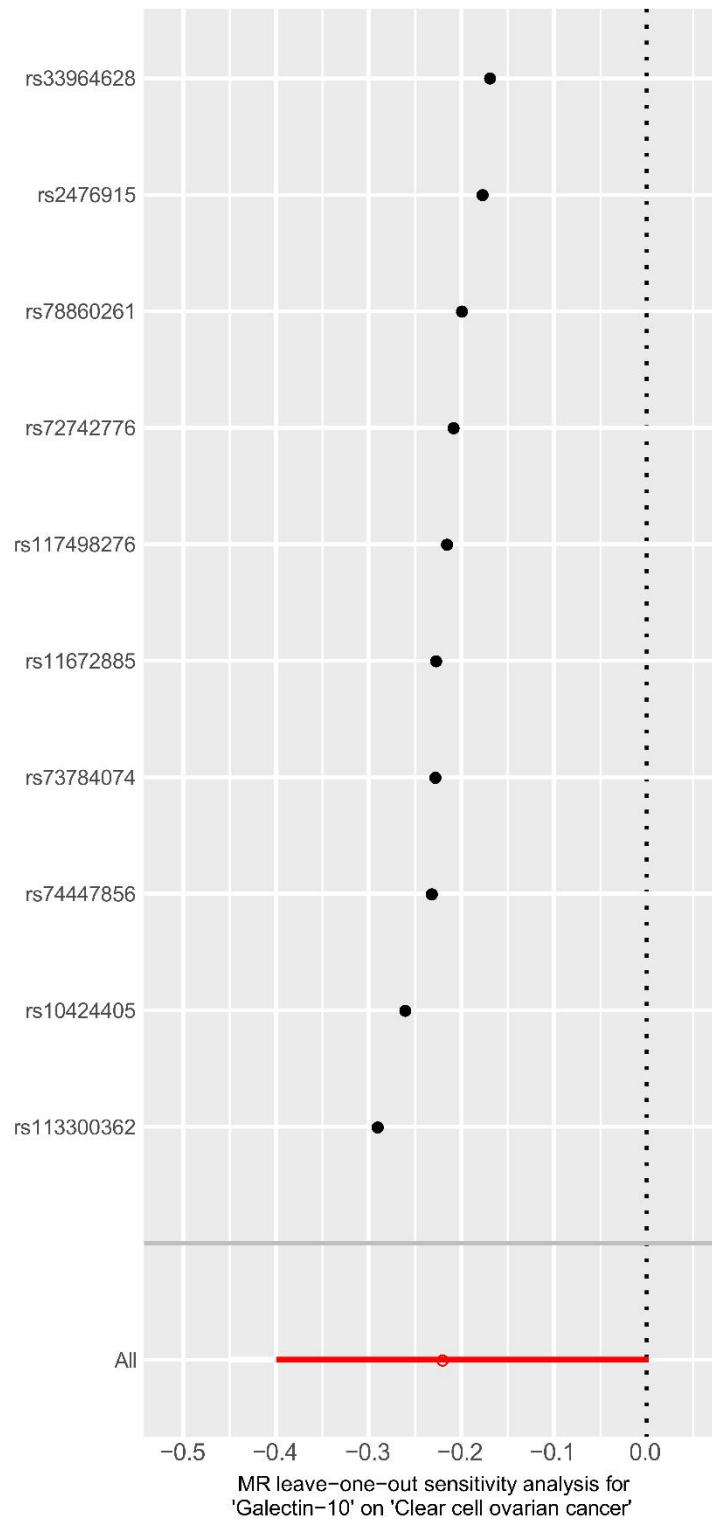

Figure S21 MR leave-one-out sensitivity analysis of Galectin-10 to Clear cell ovarian Cancer

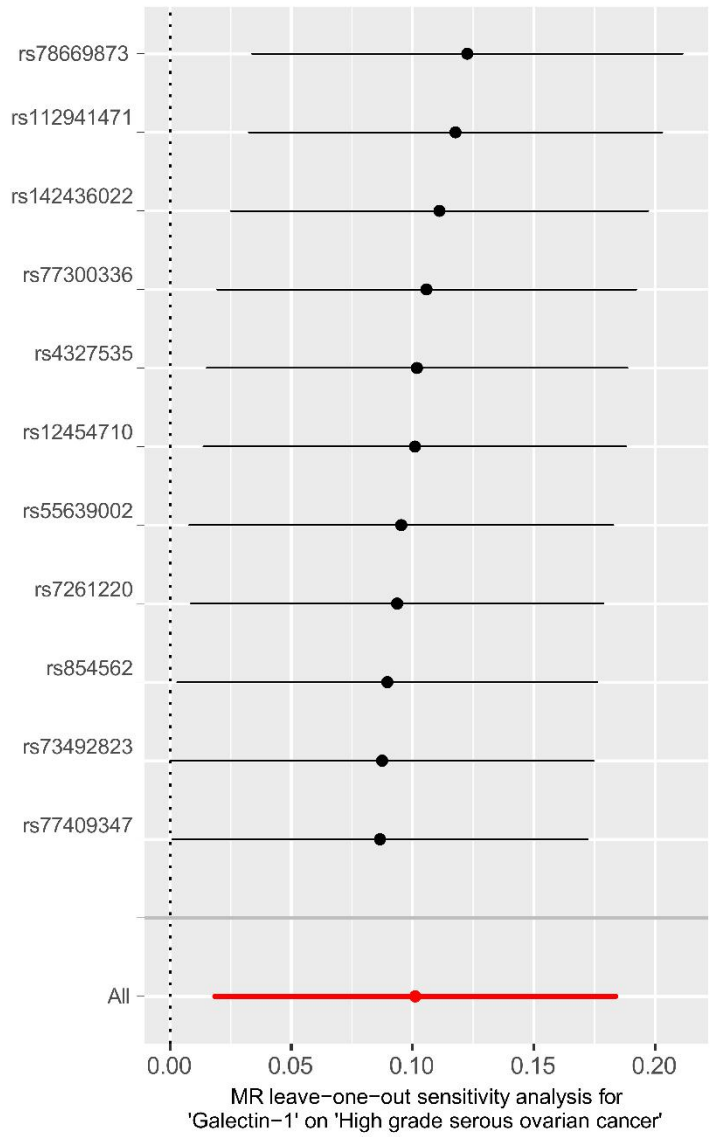

Figure S22 MR leave-one-out sensitivity analysis of Galectin-1 to High grade serous ovarian cancer

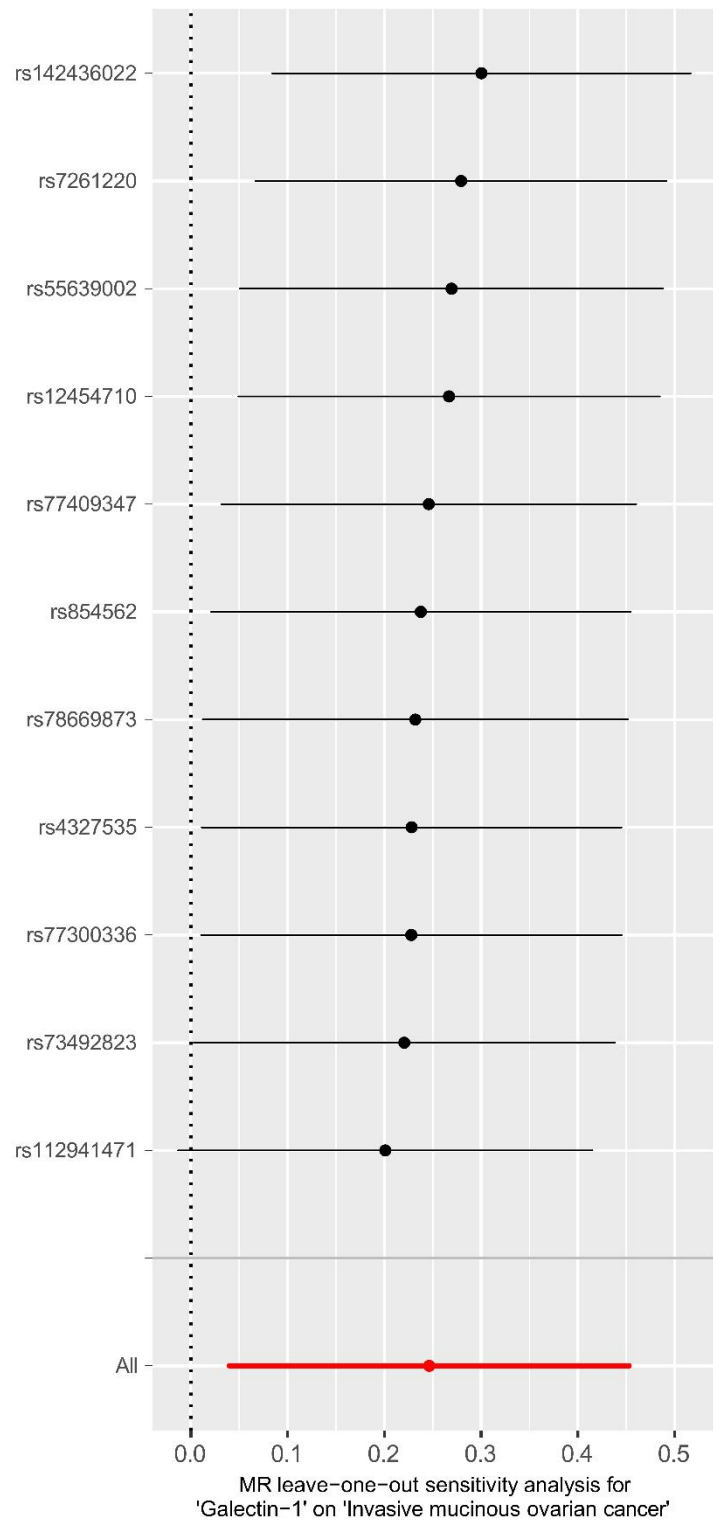

Figure S23 MR leave-one-out sensitivity analysis of Galectin-1 to Invasive mucinous ovarian cancer

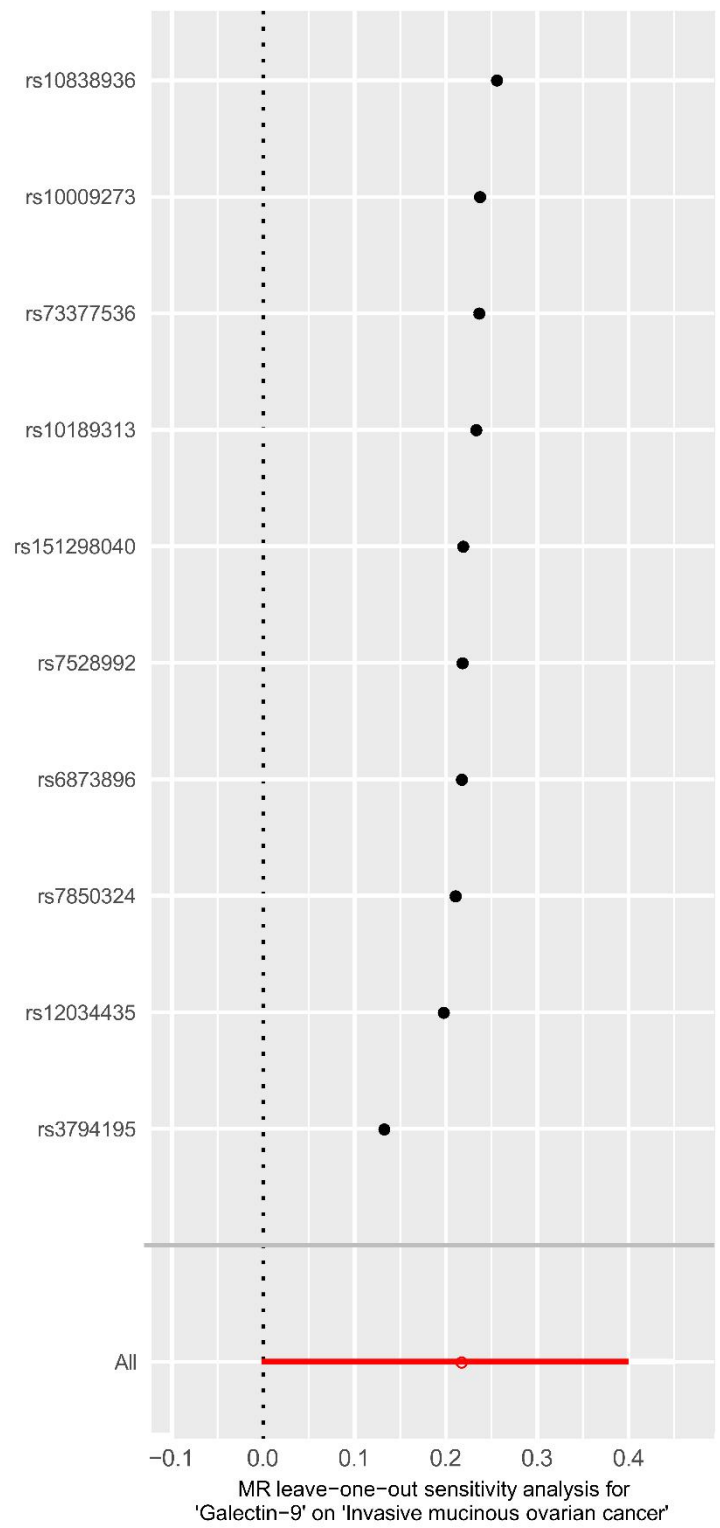

Figure S24 MR leave-one-out sensitivity analysis of Galectin-9 to Invasive mucinous ovarian cancer

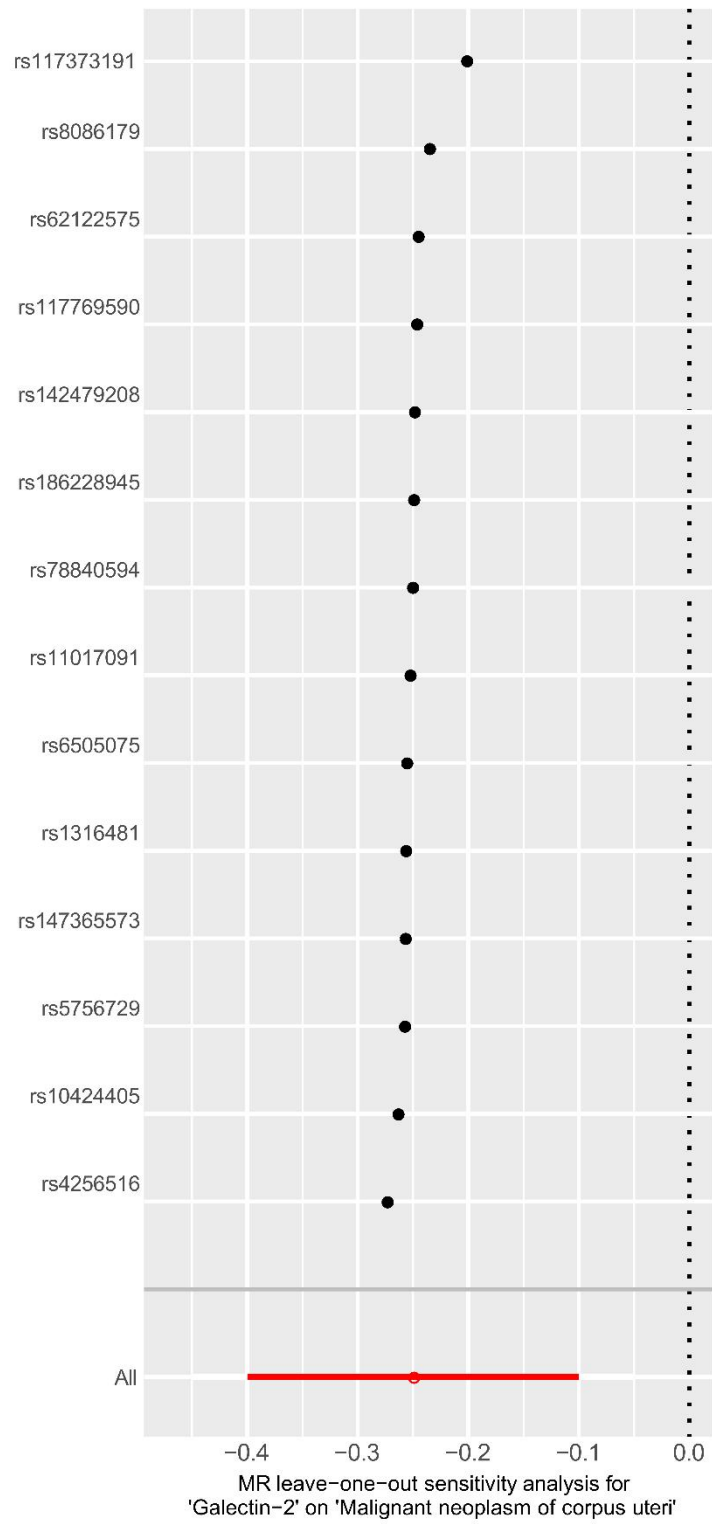

Figure S25 MR leave-one-out sensitivity analysis of Galectin-2 to Malignant neoplasm of corpus uteri

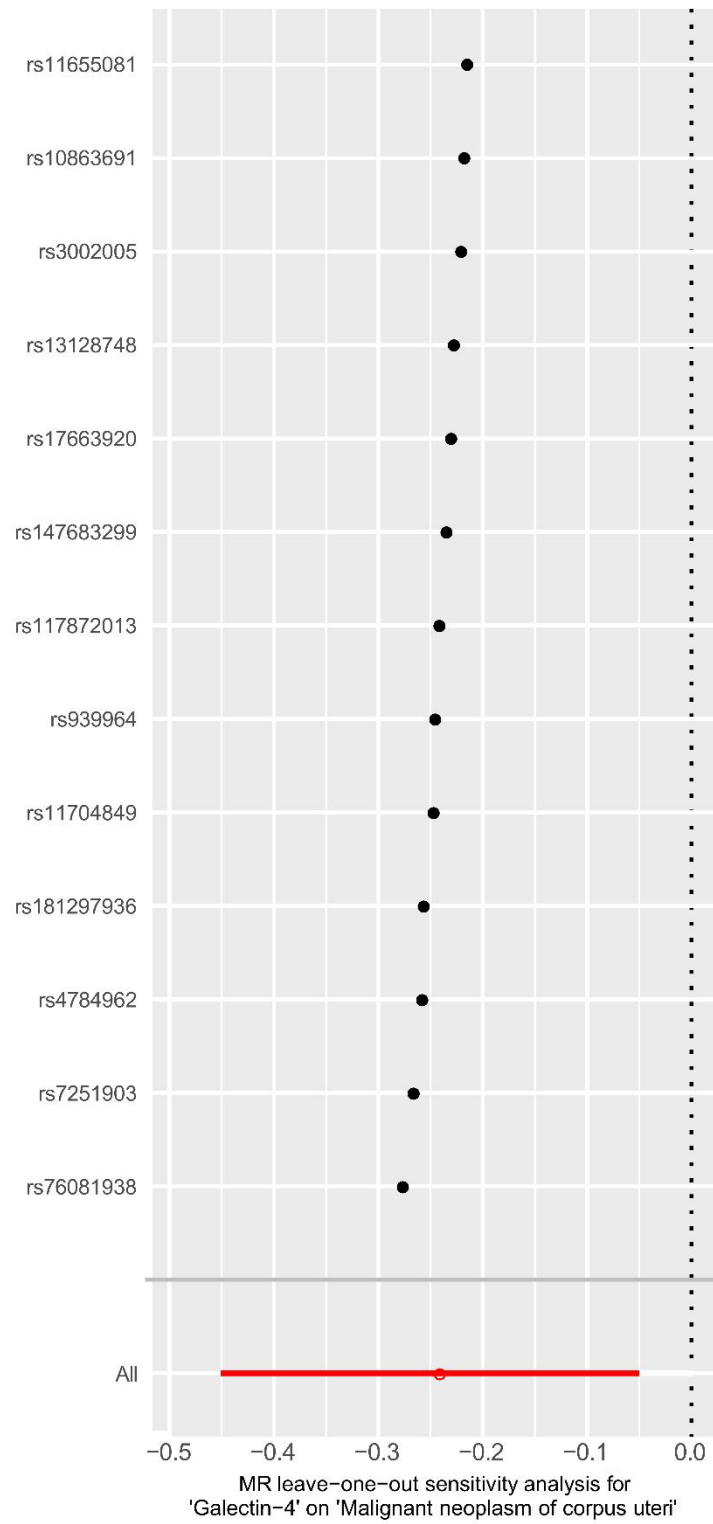

Figure S26 MR leave-one-out sensitivity analysis of Galectin-4 to Malignant neoplasm of corpus uteri

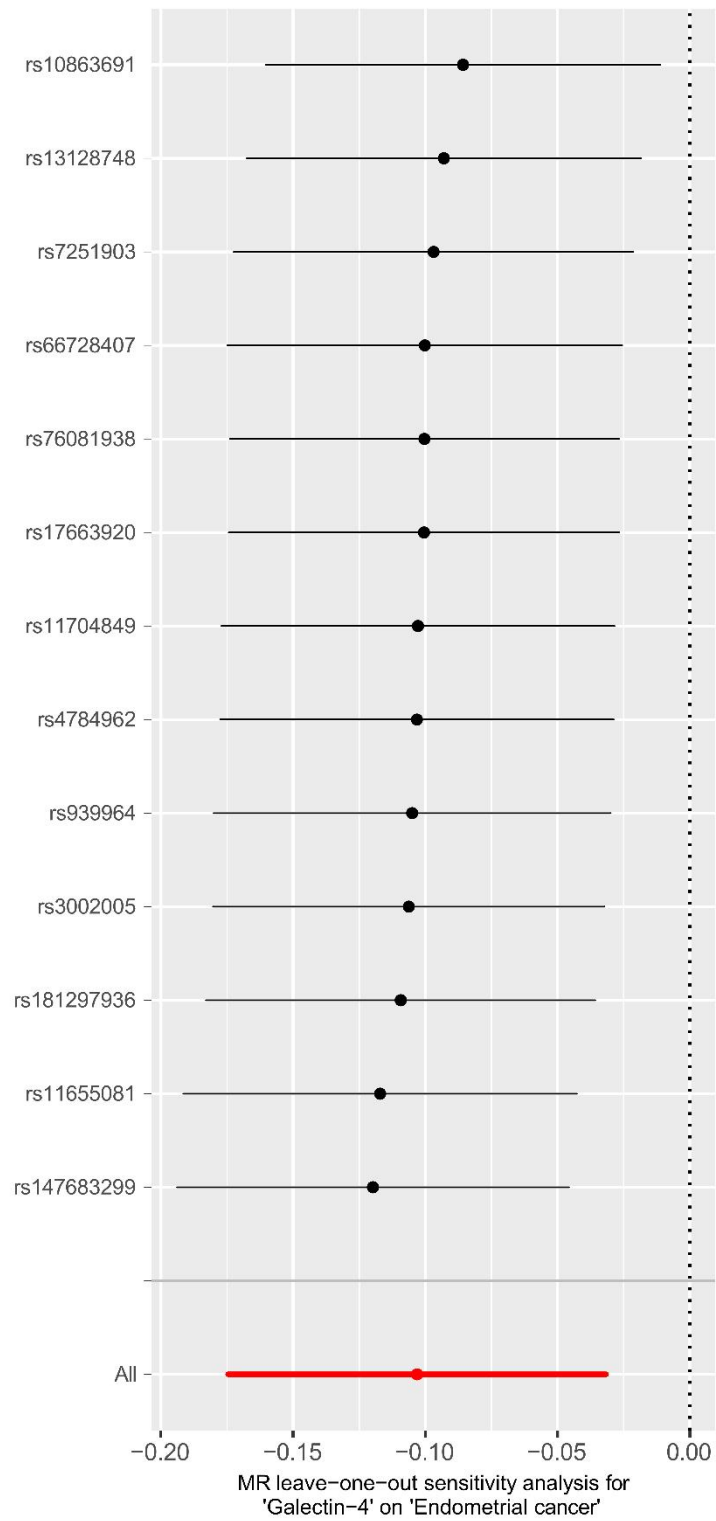

Figure S27 MR leave-one-out sensitivity analysis of Galectin-4 to Endometrial cancer

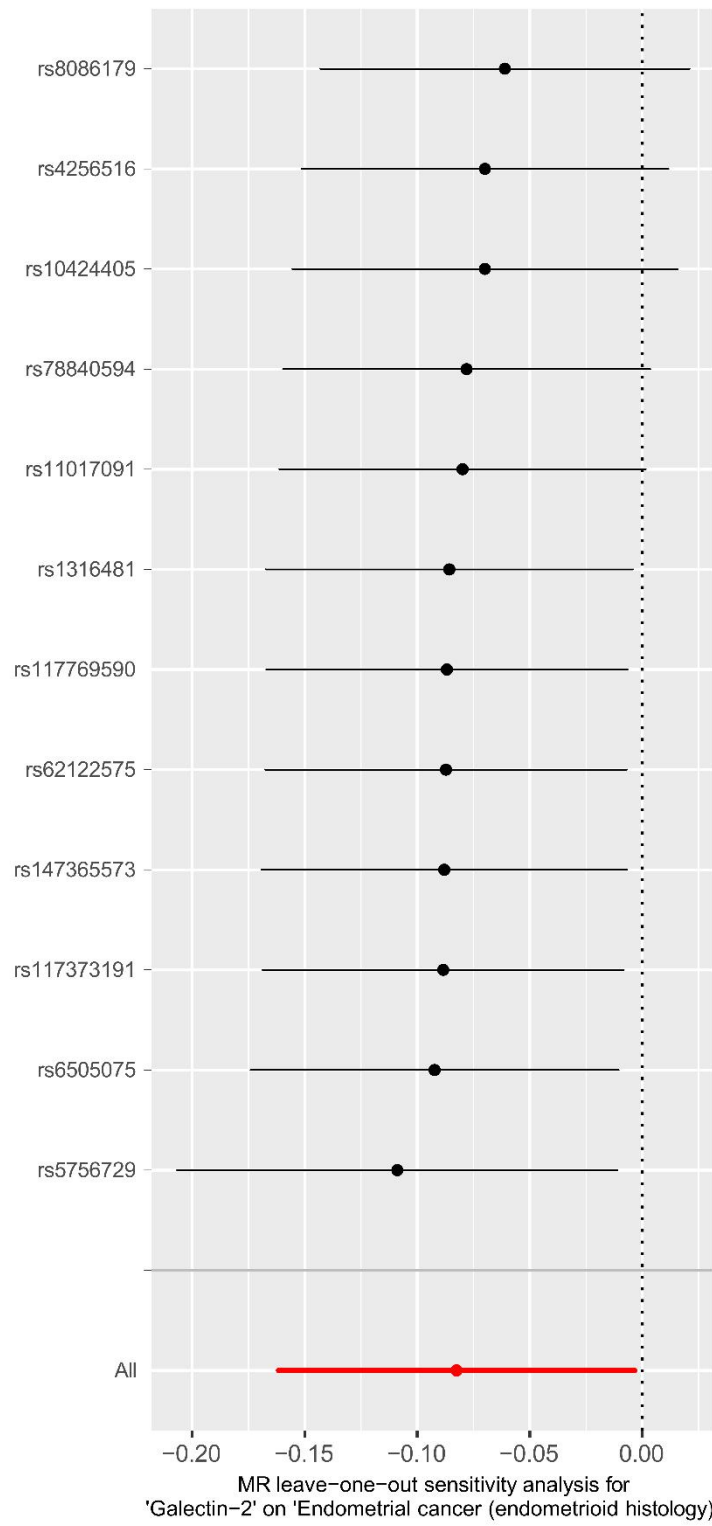

Figure S28 MR leave-one-out sensitivity analysis of Galectin-2 to Endometrial cancer (endometrioid histology)

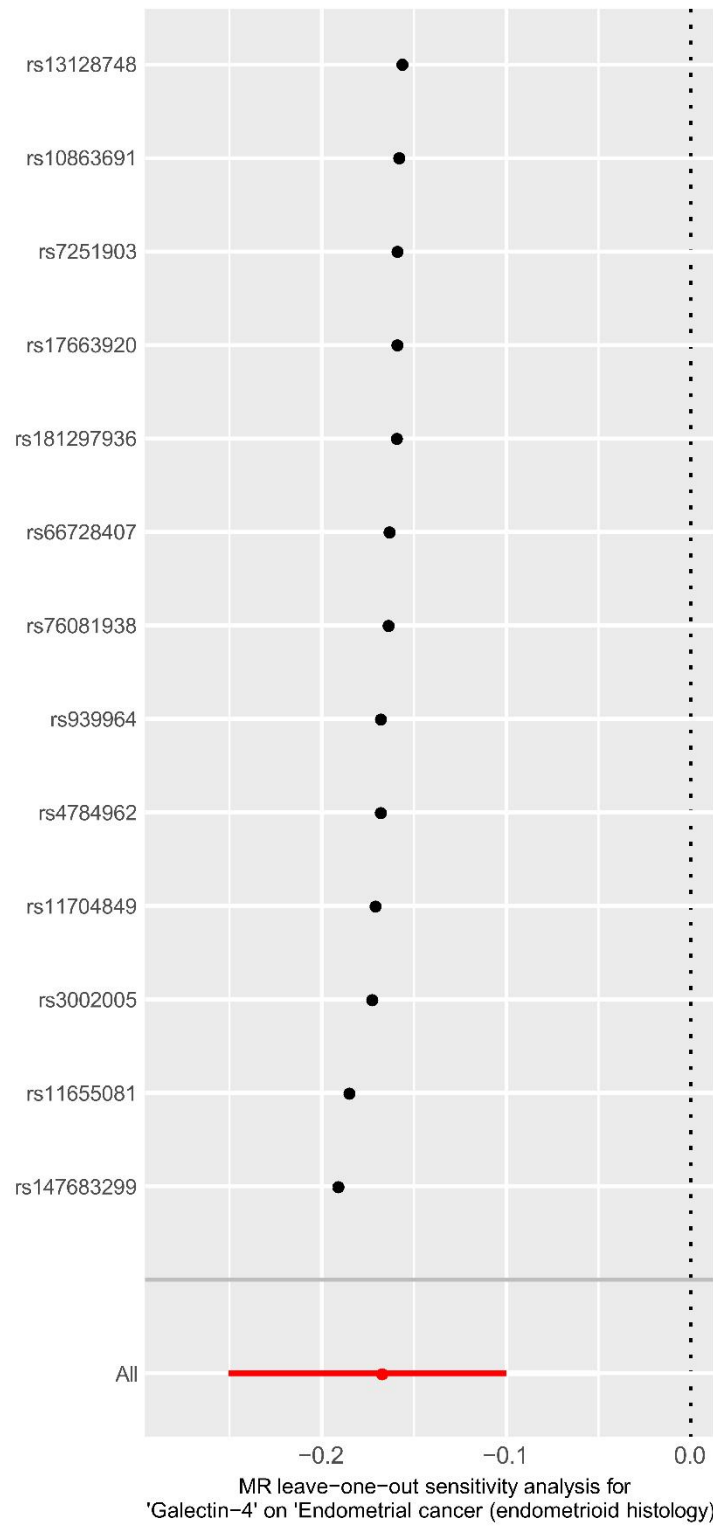

Figure S29 MR leave-one-out sensitivity analysis of Galectin-4 to Endometrial cancer (endometrioid histology)

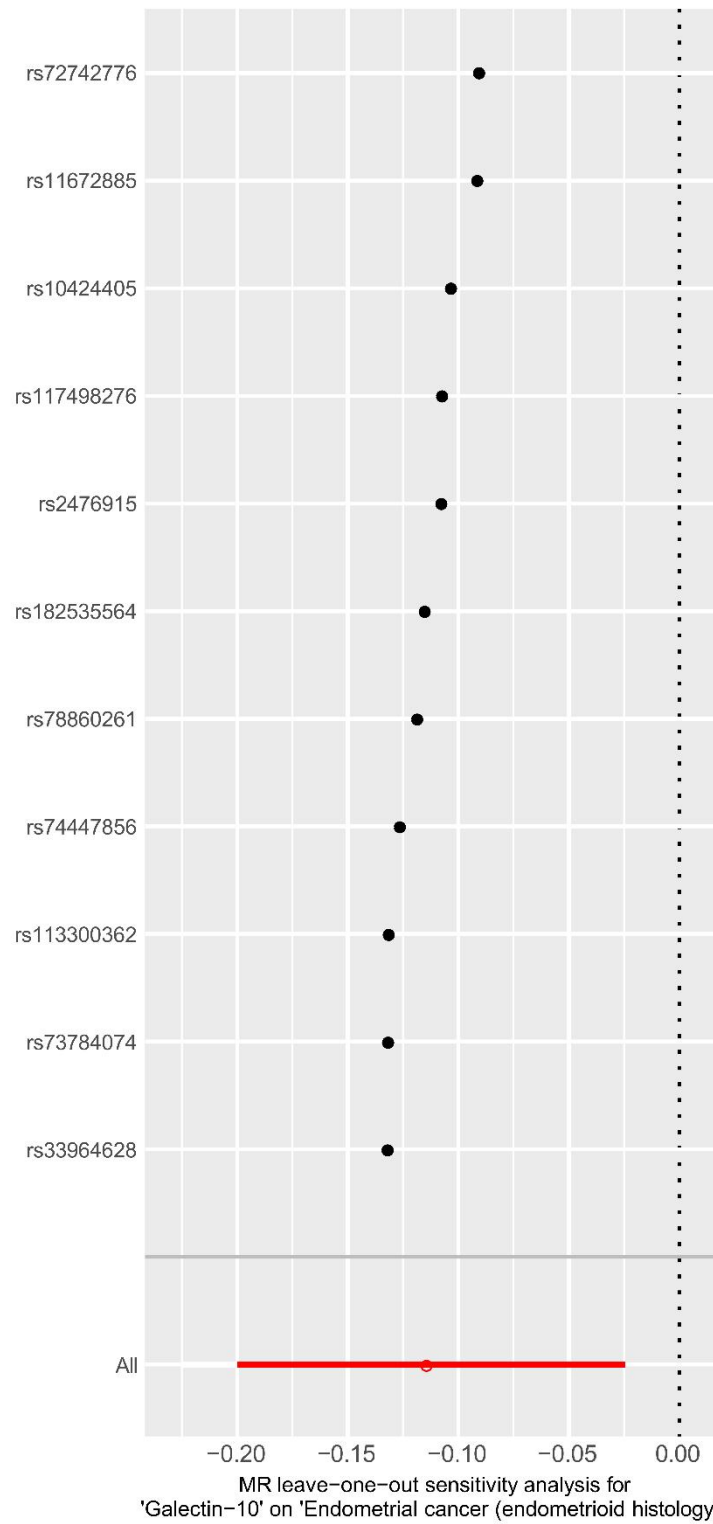

Figure S30 MR leave-one-out sensitivity analysis of Galectin-10 to Endometrial cancer (endometrioid histology)
