# Supplementary material
Source: publisher site journal article supplement (https://www.dovepress.com/article/515826)
Supplement: Supplementary file 2 [file 515826_Supplementary%2520Tables.docx]

Table S1 The information of exposures traits and outcomes（European）

| Phenotype | Samplesize  (Case) | GWAS ID | Consortium |
| --- | --- | --- | --- |
| Exposures |  |  |  |
| Galectin-1 | 3,301 | [prot-a-1726](https://gwas.mrcieu.ac.uk/datasets/prot-a-1726/) |  |
| Galectin-2 | 3,301 | prot-a-1727 |  |
| Galectin-3 | 3,394 | [prot-b-6](https://gwas.mrcieu.ac.uk/datasets/prot-b-6/) |  |
| Galectin-4 | 3,301 | prot-a-1728 |  |
| Galectin-7 | 3,301 | prot-a-1729 |  |
| Galectin-8 | 3,301 | prot-a-1731 |  |
| Galectin-9 | 3,301 | [prot-a-1732](https://gwas.mrcieu.ac.uk/datasets/prot-a-1732/) |  |
| Galectin-10 | 3,301 | prot-a-567 |  |
| Outcomes |  |  |  |
| Cervical cancer | 199,086 (563) | [ieu-b-4876](https://gwas.mrcieu.ac.uk/datasets/ieu-b-4876/) | MRC-IEU |
| Ovarian cancer | 66,450 (25,509) | ieu-a-1120 | OCAC |
| Clear cell ovarian cancer | 42,307 (1,366) | ieu-a-1124 | OCAC |
| Endometrioid ovarian cancer | 43,751 (2,810) | ieu-a-1125 | OCAC |
| High grade serous ovarian cancer | 53,978 (13,037) | ieu-a-1121 | OCAC |
| Low grade serous ovarian cancer | 41,953 (1,012) | ieu-a-1122 | OCAC |
| Invasive mucinous ovarian cancer | 42,358 (1,417) | ieu-a-1123 | OCAC |
| Malignant neoplasm of corpus uteri | 123,579 (1,053) | finn-b-C3_CORPUS_UTERI | FinnGEN |
| Endometrial cancer | 121,885 (12,906) | ebi-a-GCST006464 | MRC-IEU |
| Endometrial cancer  (endometrioid histology) | 54,884 (8,758) | [ebi-a-GCST006465](https://gwas.mrcieu.ac.uk/datasets/ebi-a-GCST006465/) | MRC-IEU |
| Endometrial cancer (Non-endometrioid histology) | 36,677 (1,230) | ebi-a-GCST006466 | MRC-IEU |

Table S2 The screening procedure of SNP MR

| Outcome and exposure | Selected SNP (P<5E-06) | Omitted LD SNP | Drop  palindromic SNP | MR-PRESSO  Outlier SNP | Radial MR Outlier SNP | F-value | R2 (%) |
| --- | --- | --- | --- | --- | --- | --- | --- |
| Cervical cancer |  |  |  |  |  |  |  |
| Galectin-1 | 64 | 12 | 5 | NA | NA | 23 | 3.49 |
| Galectin-2 | 132 | 15 | 11 | NA | NA | 34 | 11.28 |
| Galectin-3 | 1234 | 8 | 7 | NA | NA | 67 | 13.12 |
| Galectin-4 | 135 | 15 | 11 | NA | NA | 24 | 8.62 |
| Galectin-7 | 418 | 18 | 14 | NA | NA | 28 | 12.38 |
| Galectin-8 | 46 | 21 | 14 | NA | NA | 23 | 9.84 |
| Galectin-9 | 265 | 13 | 10 | NA | NA | 26 | 7.87 |
| Galectin-10 | 72 | 12 | 9 | NA | NA | 25 | 7.59 |
| Ovarian cancer |  |  |  |  |  |  |  |
| Galectin-1 | 64 | 12 | 11 | NA | NA | 23 | 7.54 |
| Galectin-2 | 132 | 15 | 14 | NA | NA | 32 | 13.21 |
| Galectin-3 | 1234 | 8 | 7 | NA | NA | 66 | 12.84 |
| Galectin-4 | 135 | 15 | 14 | NA | NA | 24 | 10.64 |
| Galectin-7 | 418 | 18 | 16 | NA | NA | 27 | 12.96 |
| Galectin-8 | 46 | 21 | 17 | NA | NA | 23 | 11.80 |
| Galectin-9 | 265 | 13 | 10 | NA | NA | 27 | 8.05 |
| Galectin-10 | 72 | 12 | 10 | NA | NA | 25 | 8.31 |
| Clear cell ovarian cancer |  |  |  |  |  |  |  |
| Galectin-1 | 64 | 12 | 11 | NA | NA | 23 | 7.54 |
| Galectin-2 | 132 | 15 | 14 | NA | NA | 32 | 13.21 |
| Galectin-3 | 1234 | 8 | 7 | NA | NA | 66 | 12.84 |
| Galectin-4 | 135 | 15 | 14 | NA | NA | 24 | 10.64 |
| Galectin-7 | 418 | 18 | 16 | NA | NA | 27 | 12.96 |
| Galectin-8 | 46 | 21 | 17 | NA | NA | 23 | 11.80 |
| Galectin-9 | 265 | 13 | 10 | NA | NA | 27 | 8.05 |
| Galectin-10 | 72 | 12 | 10 | NA | NA | 25 | 8.31 |
| Endometrioid ovarian cancer |  |  |  |  |  |  |  |
| Galectin-1 | 64 | 12 | 11 | NA | NA | 23 | 7.54 |
| Galectin-2 | 132 | 15 | 14 | NA | NA | 32 | 13.21 |
| Galectin-3 | 1234 | 8 | 7 | NA | NA | 66 | 12.84 |
| Galectin-4 | 135 | 15 | 14 | NA | NA | 24 | 10.64 |
| Galectin-7 | 418 | 18 | 16 | NA | NA | 27 | 12.96 |
| Galectin-8 | 46 | 21 | 17 | NA | NA | 23 | 11.80 |
| Galectin-9 | 265 | 13 | 10 | NA | NA | 27 | 8.05 |
| Galectin-10 | 72 | 12 | 10 | NA | NA | 25 | 8.31 |
| High grade serous ovarian cancer |  |  |  |  |  |  |  |
| Galectin-1 | 64 | 12 | 11 | NA | NA | 23 | 7.54 |
| Galectin-2 | 132 | 15 | 14 | NA | NA | 32 | 13.21 |
| Galectin-3 | 1234 | 8 | 7 | NA | NA | 66 | 12.84 |
| Galectin-4 | 135 | 15 | 14 | NA | NA | 24 | 10.64 |
| Galectin-7 | 418 | 18 | 16 | NA | NA | 27 | 12.96 |
| Galectin-8 | 46 | 21 | 17 | NA | NA | 23 | 11.80 |
| Galectin-9 | 265 | 13 | 10 | NA | NA | 27 | 8.05 |
| Galectin-10 | 72 | 12 | 10 | NA | NA | 25 | 8.31 |
| Low grade serous ovarian cancer |  |  |  |  |  |  |  |
| Galectin-1 | 64 | 12 | 11 | NA | NA | 23 | 7.54 |
| Galectin-2 | 132 | 15 | 14 | NA | NA | 32 | 13.21 |
| Galectin-3 | 1234 | 8 | 7 | NA | NA | 66 | 12.84 |
| Galectin-4 | 135 | 15 | 14 | NA | NA | 24 | 10.64 |
| Galectin-7 | 418 | 18 | 16 | NA | NA | 27 | 12.96 |
| Galectin-8 | 46 | 21 | 17 | NA | NA | 23 | 11.80 |
| Galectin-9 | 265 | 13 | 10 | NA | NA | 27 | 8.05 |
| Galectin-10 | 72 | 12 | 10 | NA | NA | 25 | 8.31 |
| Invasive mucinous ovarian cancer |  |  |  |  |  |  |  |
| Galectin-1 | 64 | 12 | 11 | NA | NA | 23 | 7.54 |
| Galectin-2 | 132 | 15 | 14 | NA | NA | 32 | 13.21 |
| Galectin-3 | 1234 | 8 | 7 | NA | NA | 66 | 12.84 |
| Galectin-4 | 135 | 15 | 14 | NA | NA | 24 | 10.64 |
| Galectin-7 | 418 | 18 | 16 | NA | NA | 27 | 12.96 |
| Galectin-8 | 46 | 21 | 17 | NA | NA | 23 | 11.80 |
| Galectin-9 | 265 | 13 | 10 | NA | NA | 27 | 8.05 |
| Galectin-10 | 72 | 12 | 10 | NA | NA | 25 | 8.31 |
| Malignant neoplasm of corpus uteri |  |  |  |  |  |  |  |
| Galectin-1 | 64 | 12 | 11 | NA | NA | 23 | 7.45 |
| Galectin-2 | 132 | 15 | 14 | NA | NA | 32 | 13.19 |
| Galectin-3 | 1234 | 8 | 7 | NA | rs1361715 | 73 | 12.12 |
| Galectin-4 | 135 | 15 | 13 | NA | NA | 23 | 9.81 |
| Galectin-7 | 418 | 18 | 16 | rs62191452  rs6557747  rs6993770 | rs62191452 | 24 | 9.48 |
| Galectin-8 | 46 | 21 | 20 | NA | NA | 23 | 13.90 |
| Galectin-9 | 265 | 13 | 11 | NA | NA | 26 | 8.74 |
| Galectin-10 | 72 | 12 | 10 | NA | NA | 25 | 8.31 |
| Endometrial cancer |  |  |  |  |  |  |  |
| Galectin-1 | 64 | 12 | 9 | NA | NA | 23 | 6.25 |
| Galectin-2 | 132 | 15 | 12 | NA | NA | 33 | 11.89 |
| Galectin-3 | 1234 | 8 | 8 | NA | NA | 62 | 13.81 |
| Galectin-4 | 135 | 15 | 13 | NA | NA | 24 | 9.96 |
| Galectin-7 | 418 | 18 | 17 | NA | rs376593447 | 27 | 13.07 |
| Galectin-8 | 46 | 21 | 21 | NA | rs144975640 | 23 | 13.85 |
| Galectin-9 | 265 | 13 | 12 | NA | NA | 26 | 9.37 |
| Galectin-10 | 72 | 12 | 11 | NA | NA | 25 | 9.05 |
| Endometrial cancer  (endometrioid histology) |  |  |  |  |  |  |  |
| Galectin-1 | 64 | 12 | 9 | NA | NA | 23 | 6.25 |
| Galectin-2 | 132 | 15 | 12 | NA | NA | 33 | 11.89 |
| Galectin-3 | 1234 | 8 | 8 | NA | NA | 62 | 13.81 |
| Galectin-4 | 135 | 15 | 13 | NA | NA | 24 | 9.96 |
| Galectin-7 | 418 | 18 | 17 | NA | rs376593447 | 27 | 13.07 |
| Galectin-8 | 46 | 21 | 21 | NA | rs144975640 | 23 | 13.85 |
| Galectin-9 | 265 | 13 | 12 | NA | NA | 26 | 9.37 |
| Galectin-10 | 72 | 12 | 11 | NA | NA | 25 | 9.05 |
| Endometrial cancer (Non-endometrioid histology) |  |  |  |  |  |  |  |
| Galectin-1 | 64 | 12 | 8 | NA | NA | 23 | 5.52 |
| Galectin-2 | 132 | 15 | 11 | NA | NA | 34 | 11.25 |
| Galectin-3 | 1234 | 8 | 8 | NA | NA | 62 | 13.81 |
| Galectin-4 | 135 | 15 | 12 | NA | NA | 24 | 9.24 |
| Galectin-7 | 418 | 18 | 16 | NA | NA | 27 | 13.07 |
| Galectin-8 | 46 | 21 | 20 | NA | NA | 23 | 13.85 |
| Galectin-9 | 265 | 13 | 12 | NA | NA | 26 | 9.37 |
| Galectin-10 | 72 | 12 | 11 | NA | NA | 25 | 9.05 |
